# Supplementary material for: Optimizing accuracy and efficacy in data-driven materials discovery for the solar production of hydrogen
Source: Royal Society of Chemistry journal article supplement (doi:10.1039/d0ee02984j), 2021-01-01
Supplement: d0ee02984j1.pdf [file d0ee02984j1.pdf]

## Electronic Supplementary Information (ESI): Optimizing accuracy and efficacy in data-driven materials discovery for the solar production of hydrogen

Y. Xiong,<sup>a</sup> Q. T. Campbell,<sup>b</sup> J. Fanghanel,<sup>a,c</sup> C. K. Badding,<sup>d</sup> H. Wang,<sup>a</sup> N. E. Kirchner-Hall,<sup>a</sup> M. J. Theibault,<sup>d</sup> I. Timrov,<sup>e</sup> J. S. Mondschein,<sup>c</sup> K. Seth,<sup>c</sup> R. R. Katzbaer,<sup>c</sup> A. Molina Villarino,<sup>d</sup> B. Pamuk,<sup>f</sup> M. E. Penrod,<sup>a</sup> M. M. Khan,<sup>a</sup> T. Rivera,<sup>c</sup> C. Smith,<sup>g</sup> X. Quintana,<sup>a</sup> P. Orbe,<sup>a</sup> C. J. Fennie,<sup>f</sup> S. Asem-Hiablie,<sup>h</sup> J. L. Young,<sup>i</sup> T. G. Deutsch,<sup>j</sup> M. Cococcioni,<sup>j</sup> V. Gopalan,<sup>a</sup> H. D. Abruña,<sup>d</sup> R. E. Schaak,<sup>c</sup> I. Dabo<sup>a</sup>

<sup>a</sup> Department of Materials Science and Engineering, and Materials Research Institute, The Pennsylvania State University, University Park, PA, USA

<sup>b</sup> Sandia National Laboratories, Albuquerque, NM, USA

<sup>c</sup> Department of Chemistry and Materials Research Institute, The Pennsylvania State University, University Park, PA, USA

<sup>d</sup> Department of Chemistry and Chemical Biology, Cornell University, Ithaca, NY, USA

<sup>e</sup> Theory and Simulation of Materials (THEOS) and National Centre for Computational Design and Discovery of Novel Materials (MARVEL), École Polytechnique Fédérale de Lausanne, CH-1015 Lausanne, Switzerland

<sup>f</sup> School of Applied and Engineering Physics, Cornell University, Ithaca, NY, USA

<sup>g</sup> Department of Materials Science and Engineering, Northwestern University, Evanston, IL, USA

<sup>h</sup> Department of Agricultural and Biological Engineering, The Pennsylvania State University, University Park, PA, USA

<sup>i</sup> National Renewable Energy Laboratory, Golden, CO, USA

<sup>j</sup> Department of Physics, University of Pavia, Pavia, Italy

### S1. Criteria of the literature survey

The literature survey was performed using the Web of Science database by applying the criteria in Fig. S1. The initial search returned 626 publications, which were then examined individually. Publications focusing exclusively on experimental synthesis and/or characterization were removed from the literature survey. Computational studies with less than 50 candidate materials were also not considered. Using this approach, we identified 202 papers. These articles were read to categorize them into technological areas and determine whether they include validation experiments. The results of the survey are shown in Fig. 1 of the main text.

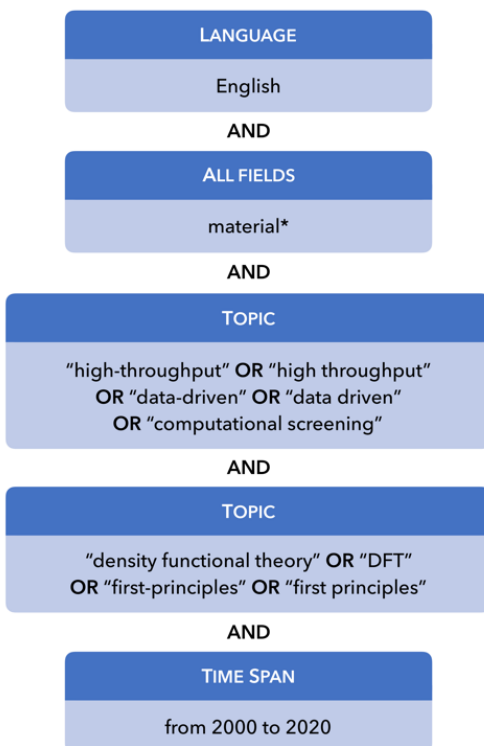

**Figure S1** Criteria for the survey of peer-reviewed publications in high-throughput computational materials science.

## S2. Criteria of the computational screening

Figure S2 shows the domains spanned by the candidate materials with the Hubbard  $U$  correction (Domain A) and without this correction (Domain B). Domain A is delimited by the standard criteria of water splitting:  $1.5 < \varepsilon_g < 2.5$  eV,  $E_{VB} > 1.2$  V vs. SHE, and  $E_{CB} < 0$  V vs. SHE, as discussed in the main text. Domain B is constructed by rescaling the band gap  $\varepsilon_g = e(E_{VB} - E_{CB})$  of each point in Domain A by a factor  $\gamma$  while keeping the flatband potential  $E_{FB} = (E_{VB} + E_{CB})/2$  constant. Explicitly, the  $\gamma$ -dependent transformation  $T_\gamma$  can be written as  $(E_{VB}, E_{CB}) \rightarrow (E_{VB} - (1 - \gamma)(E_{VB} - E_{CB})/2, E_{CB} + (1 - \gamma)(E_{VB} - E_{CB})/2)$ . Domain B is obtained by merging all the images of Domain A through  $T_\gamma$  for  $\gamma$  ranging from 0.5 to 0.8 (corresponding to the typical margin of error of band gaps within DFT). The resulting criteria are  $0.75 < \varepsilon_g < 2$  eV,  $E_{VB} > 0.575$  V vs. SHE, and  $E_{CB} < 0.625$  V vs. SHE. These criteria are used in the screening outlined in Fig. 2 of the main text.

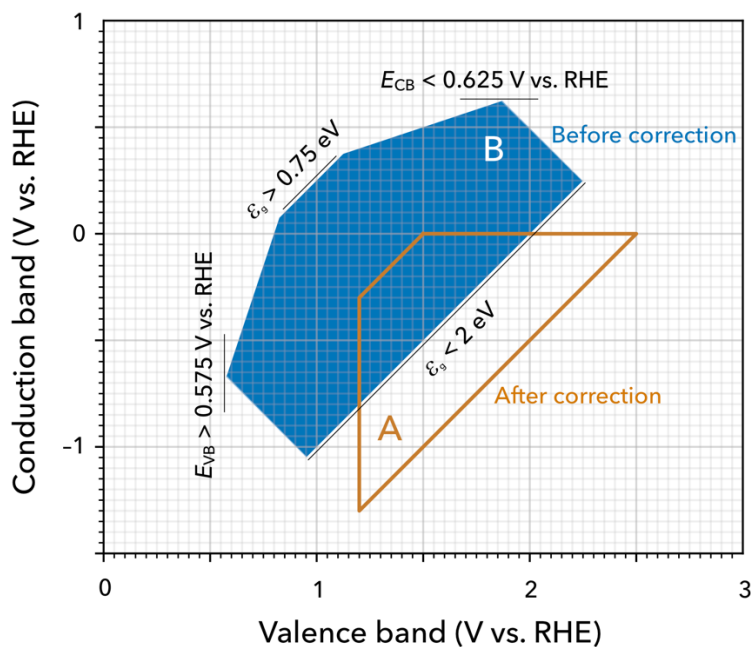

**Figure S2** Domains spanned by admissible candidates with Hubbard  $U$  correction (Domain A, orange) and without correction (Domain B, blue).

### S3. Calculations of band gap and band edges

The band gaps and band edges computed using DFT and DFT+ $U$  are reported in Table S1. The distributions of the  $U$  parameters calculated from first principles using linear-response theory are provided in Fig. S3. For comparison, we summarized the band gaps from the Materials Project in Table S2.

**Table S1** Band gaps and band edges of the 162 candidate photocatalysts calculated using DFT with the PBE functional and DFT+ $U$ . The  $U$  parameters are computed from first principles *via* one-shot calculations within density-functional perturbation theory (DFPT)<sup>1</sup> using the QUANTUM ESPRESSO distribution.<sup>2,3</sup> “None” indicates that the compound does not contain elements on which the Hubbard correction is applied. Orthogonalized atomic orbitals are selected as projectors on the Hubbard manifold using the Löwdin method. The structures are optimized at the DFT level (*i.e.* without the Hubbard  $U$  correction). To enable systematic sorting, the elements in the chemical formula are ordered by increasing electronegativity, following the naming convention of the Materials Project (the conventional nomenclature is used in the main text). The space group and the  $U$  parameters are provided for each compound. Band edges are reported relative to the reversible hydrogen electrode (RHE). The absolute value of the hydrogen electrode potential is of 4.44 V. Calculations that could not go through the computational cycle are marked as “DFT incomplete”, “DFPT incomplete” and “DFT+ $U$  incomplete” to indicate of an incomplete convergence in computing the DFT ground state, the Hubbard  $U$  parameters, and the DFT+ $U$  ground state, respectively. DFT and DFT+ $U$  data are reported for two  $\text{CaIn}_2\text{O}_4$  phases (the cubic phase and the experimentally observed orthorhombic phase).

|                                                  | Space group  | $U$ parameters (eV)                        | $\epsilon_g$ (eV) | DFT $eE_{CB}$ (eV) | $eE_{VB}$ (eV) | $\epsilon_g$ (eV) | DFT+ $U$ $eE_{CB}$ (eV) | $eE_{VB}$ (eV) |
|--------------------------------------------------|--------------|--------------------------------------------|-------------------|--------------------|----------------|-------------------|-------------------------|----------------|
| $\text{AlCuO}_2$                                 | $R\bar{3}m$  | 10.3 (Cu-3d), 9.2 (O-2p)                   | 1.78              | 0.02               | 1.81           | 3.07              | -0.62                   | 2.45           |
| $\text{Ba}_2\text{Fe}_2\text{O}_5$               | $P2_1/c$     | ×                                          |                   | DFT incomplete     |                | ×                 | ×                       | ×              |
| $\text{Ba}_2\text{In}_2\text{S}_5$               | $Pbca$       | None                                       | 2.04              | -1.15              | 0.89           | —                 | —                       | —              |
| $\text{Ba}_2\text{PbO}_4$                        | $I4/mmm$     | 8.9 (O-2p)                                 | 1.30              | -0.14              | 1.16           | 2.05              | -0.51                   | 1.53           |
| $\text{Ba}_2\text{SnSe}_3\text{F}_2$             | $Pnma$       | None                                       | 1.72              | -0.08              | 1.64           | —                 | —                       | —              |
| $\text{Ba}_3\text{MnNb}_2\text{O}_9$             | $P\bar{3}m1$ | 8.1 (Mn-3d),<br>3.3 (Nb-4d),<br>8.4 (O-2p) | 0.62              | 0.51               | 1.13           | 3.04              | -0.70                   | 2.34           |
| $\text{Ba}_3\text{Zn}_5\text{In}_2\text{O}_{11}$ | $F\bar{4}3m$ | ×                                          |                   | DFT incomplete     |                | ×                 | ×                       | ×              |
| $\text{Ba}_6\text{Mn}_5\text{O}_{16}$            | $Cmce$       | 5.2 (Mn-3d), 8.9 (O-2p)                    | 0.75              | 0.31               | 1.07           | 0.78              | 0.30                    | 1.08           |
| $\text{Ba}_6\text{V}_4\text{S}_{11}\text{O}_5$   | $Pnma$       | ×                                          |                   | DFT incomplete     |                | ×                 | ×                       | ×              |
| $\text{Ba}_8\text{Sb}_6\text{S}_{17}$            | $P2/c$       | ×                                          |                   | DFT incomplete     |                | ×                 | ×                       | ×              |
| $\text{BaAlSi}_5\text{N}_7\text{O}_2$            | $P1$         | ×                                          | 3.85              | -0.68              | 3.17           |                   | DFPT incomplete         |                |
| $\text{BaCaFe}_4\text{O}_8$                      | $P\bar{3}1m$ | 6.4 (Fe-3d), 8.4 (O-2p)                    | 0.30              | 0.74               | 1.04           | 3.52              | -0.87                   | 2.65           |
| $\text{BaCu}_2\text{O}_2$                        | $I4_1/amd$   | 12.7 (Cu-3d),<br>8.2 (O-2p)                | 1.39              | -0.27              | 1.13           | 3.22              | -1.18                   | 2.04           |
| $\text{BaHfN}_2$                                 | $P4/nmm$     | 2.7 (Hf-5d), 6.4 (N-2p)                    | 1.33              | -0.41              | 0.92           | 2.12              | -0.81                   | 1.32           |
| $\text{BaIn}_2\text{O}_4$                        | $P2_1/c$     | 10.7 (O-2p)                                | 1.38              | -0.16              | 1.22           | 3.09              | -1.02                   | 2.07           |
| $\text{BaS}_2$                                   | $C2/c$       | None                                       | 1.55              | -0.69              | 0.87           | —                 | —                       | —              |
| $\text{BaSbSe}_2\text{F}$                        | $P\bar{1}$   | None                                       | 1.36              | 0.19               | 1.55           | —                 | —                       | —              |

<sup>1</sup> Timrov, Marzari, Cococcioni, *Physical Review B* **98**, 085127 (2018).

<sup>2</sup> Giannozzi *et al.*, *Journal of Physics: Condensed Matter* **21**, 395502 (2009).

<sup>3</sup> Giannozzi *et al.*, *Journal of Physics: Condensed Matter* **29**, 465901 (2017).

|                                                   | Space group  | $U$ parameters (eV)                 | $\epsilon_g$ (eV) | DFT $eE_{CB}$ (eV) | $eE_{VB}$ (eV) | $\epsilon_g$ (eV) | DFT+ $U$ $eE_{CB}$ (eV) | $eE_{VB}$ (eV) |
|---------------------------------------------------|--------------|-------------------------------------|-------------------|--------------------|----------------|-------------------|-------------------------|----------------|
| BaSnS <sub>2</sub>                                | $P2_1/c$     | None                                | 1.74              | -0.84              | 0.90           | —                 | —                       | —              |
| Ca <sub>12</sub> Al <sub>14</sub> O <sub>33</sub> | $C2$         | 9.7 (O-2p)                          | 2.01              | -0.65              | 1.37           | 3.73              | -1.5                    | 2.23           |
| Ca <sub>2</sub> CoO <sub>3</sub>                  | $Cm$         | 6.6 (Co-3d), 7.8 (O-2p)             | 0.00              | 0.11               | 0.11           | 2.70              | -1.24                   | 1.46           |
| Ca <sub>2</sub> FeClO <sub>3</sub>                | $P4/nmm$     | 8.1 (Fe-3d), 8.4 (O-2p)             | 0.00              | 0.48               | 0.48           | 3.41              | -1.22                   | 2.19           |
| Ca <sub>2</sub> PbO <sub>4</sub>                  | $Pbam$       | 8.5 (O-2p)                          | 1.50              | -0.36              | 1.14           | 2.47              | -0.85                   | 1.62           |
| Ca <sub>3</sub> PbCl <sub>3</sub>                 | $Pm\bar{3}m$ | None                                | 1.85              | -0.92              | 0.93           | —                 | —                       | —              |
| CaFeClO <sub>2</sub>                              | $C2/m$       | ×                                   |                   | DFT incomplete     |                | ×                 | ×                       | ×              |
| CaIn <sub>2</sub> O <sub>4</sub>                  | $Fd\bar{3}m$ | 8.8 (O-2p)                          | 2.02              | -0.55              | 1.48           | 4.30              | -1.48                   | 2.62           |
| CaIn <sub>2</sub> O <sub>4</sub>                  | $Pnma$       | 8.8 (O-2p)                          | 2.03              | -0.55              | 1.48           | 4.10              | -1.58                   | 2.52           |
| CaSb <sub>10</sub> S <sub>6</sub> O <sub>10</sub> | $C2/c$       | ×                                   |                   | DFT incomplete     |                | ×                 | ×                       | ×              |
| CaTaNO <sub>2</sub>                               | $Pmc2_1$     | 3.0 (Ta-5d), 6.4 (N-2p), 8.3 (O-2p) | 1.67              | -0.09              | 1.58           | 2.46              | -0.48                   | 1.98           |
| CoPb <sub>2</sub> WO <sub>6</sub>                 | $C2/m$       | 6.0 (Co-3d), 3.4 (W-5d), 8.1 (O-2p) | 0.00              | 1.48               | 1.48           |                   | DFT+ $U$ incomplete     |                |
| Cr <sub>3</sub> BO <sub>6</sub>                   | $Pnma$       | 8.2 (O-2p), 7.5 (Cr-3d)             | 0.63              | 1.01               | 1.64           | 4.28              | -0.81                   | 3.46           |
| CrPb <sub>5</sub> O <sub>8</sub>                  | $P2_1/c$     | ×                                   |                   | DFT incomplete     |                | ×                 | ×                       | ×              |
| Cs <sub>4</sub> Ta <sub>2</sub> S <sub>11</sub>   | $Pca2_1$     | 2.7 (Ta-5d)                         | 1.78              | -0.70              | 1.08           | 1.90              | -0.76                   | 1.14           |
| Cs <sub>4</sub> Ti <sub>3</sub> S <sub>14</sub>   | $C2/c$       | 5.4 (Ti-3d)                         | 1.31              | -0.41              | 0.90           | 2.16              | -0.83                   | 1.32           |
| Cs <sub>4</sub> Zr <sub>3</sub> Se <sub>14</sub>  | $C2/c$       | 2.6 (Zr-4d)                         | 1.54              | -0.66              | 0.88           | 1.75              | -0.76                   | 0.98           |
| CsCuO <sub>2</sub>                                | $Cmcm$       | 11.3 (Cu-3d), 8.1 (O-2p)            | 1.04              | -0.11              | 0.94           | 2.32              | -0.74                   | 1.58           |
| CsGeI <sub>3</sub>                                | $R3m$        | None                                | 1.83              | -0.36              | 1.47           | —                 | —                       | —              |
| CsLaNb <sub>2</sub> O <sub>7</sub>                | $P4/mmm$     | ×                                   | 1.67              | 0.26               | 1.93           |                   | DFPT incomplete         |                |
| CsMnBr <sub>3</sub>                               | $P6_3/mmc$   | 6.3 (Mn-3d)                         | 1.36              | 0.01               | 1.37           | 3.53              | -1.08                   | 2.45           |
| CsMnI <sub>3</sub>                                | $P6_3/mmc$   | 6.2 (Mn-3d)                         | 1.02              | -0.17              | 0.85           | 2.78              | -1.05                   | 1.73           |
| CsSbS <sub>2</sub>                                | $P2_1/c$     | None                                | 1.75              | -0.81              | 0.93           | —                 | —                       | —              |
| Cu <sub>2</sub> WS <sub>4</sub>                   | $P\bar{4}2m$ | 13.5 (Cu-3d), 3.0 (W-5d)            | 1.66              | 0.12               | 1.78           | 2.06              | -0.08                   | 1.98           |
| Cu <sub>3</sub> SbS <sub>3</sub>                  | $P2_12_12_1$ | 14.8 (Cu-3d)                        | 1.06              | 0.24               | 1.31           | 1.89              | -0.17                   | 1.72           |
| Cu <sub>4</sub> Mo <sub>5</sub> O <sub>17</sub>   | $P\bar{1}$   | ×                                   |                   | DFT incomplete     |                | ×                 | ×                       | ×              |
| CuI                                               | $P3m1$       | 18.0 (Cu-3d)                        | 1.64              | 0.24               | 1.88           | 2.75              | -0.31                   | 2.44           |
| CuP <sub>2</sub>                                  | $P2_1/c$     | 14.6 (Cu-3d)                        | 0.86              | 0.34               | 1.20           | 1.02              | 0.26                    | 1.28           |
| Fe <sub>3</sub> BO <sub>6</sub>                   | $Pnma$       | 5.8 (Fe-3d), 8.6 (O-2p)             | 0.01              | 1.47               | 1.49           | 3.08              | -0.06                   | 3.02           |
| FeNi <sub>2</sub> BO <sub>5</sub>                 | $Pbam$       | ×                                   |                   | DFT incomplete     |                | ×                 | ×                       | ×              |

|                                                 | Space group | $U$ parameters (eV)         | $\epsilon_g$ (eV) | DFT $eE_{CB}$ (eV) | $eE_{VB}$ (eV) | $\epsilon_g$ (eV) | DFT+ $U$ $eE_{CB}$ (eV) | $eE_{VB}$ (eV) |
|-------------------------------------------------|-------------|-----------------------------|-------------------|--------------------|----------------|-------------------|-------------------------|----------------|
| Ga <sub>2</sub> TeSe <sub>2</sub>               | $I4_1md$    | None                        | 1.65              | -0.71              | 0.93           | —                 | —                       | —              |
| GaCuI <sub>4</sub>                              | $\bar{I}4$  | 16.7 (Cu-3d)                | 1.67              | 0.30               | 1.97           | 2.43              | -0.08                   | 2.35           |
| GaCuO <sub>2</sub>                              | $R\bar{3}m$ | 10.7 (Cu-3d),<br>8.1 (O-2p) | 0.75              | 0.53               | 1.28           | 2.46              | -0.33                   | 2.14           |
| GaN                                             | $P6_3mc$    | 5.4 (N-2p)                  | 1.72              | -0.47              | 1.25           | 2.97              | -1.09                   | 1.88           |
| GaS                                             | $P6_3/mmc$  | None                        | 2.05              | -1.00              | 1.05           | —                 | —                       | —              |
| Ge <sub>4</sub> Se <sub>9</sub>                 | $Pca2_1$    | None                        | 1.36              | 0.34               | 1.70           | —                 | —                       | —              |
| GeS                                             | $Pnma$      | None                        | 1.24              | 0.29               | 1.53           | —                 | —                       | —              |
| GeSe                                            | $Pnma$      | None                        | 0.89              | 0.32               | 1.21           | —                 | —                       | —              |
| GeSe <sub>2</sub>                               | $P2_1/c$    | None                        | 1.47              | 0.25               | 1.72           | —                 | —                       | —              |
| GeTe                                            | $R3m$       | None                        | 0.57              | 0.30               | 0.87           | —                 | —                       | —              |
| In <sub>2</sub> O <sub>3</sub>                  | $I2_13$     | 9.2 (O-2p)                  | 0.95              | 0.37               | 1.32           | 3.59              | -0.95                   | 2.64           |
| In <sub>4</sub> Bi <sub>2</sub> S <sub>9</sub>  | $P2_1/m$    | None                        | 1.74              | 0.07               | 1.81           | —                 | —                       | —              |
| InBr                                            | $Cmcm$      | None                        | 1.26              | -0.22              | 1.04           | —                 | —                       | —              |
| InI                                             | $Cmcm$      | None                        | 1.33              | -0.53              | 0.80           | —                 | —                       | —              |
| InSb <sub>2</sub> S <sub>4</sub> Br             | $C2/m$      | None                        | 1.58              | 0.26               | 1.84           | —                 | —                       | —              |
| InSb <sub>2</sub> S <sub>4</sub> Cl             | $C2/m$      | None                        | 1.61              | 0.31               | 1.92           | —                 | —                       | —              |
| InSb <sub>2</sub> Se <sub>4</sub> Br            | $P\bar{1}$  | None                        | 1.15              | 0.33               | 1.48           | —                 | —                       | —              |
| K <sub>2</sub> CoCl <sub>4</sub>                | $Pna2_1$    | ×                           |                   | DFT incomplete     |                | ×                 | ×                       | ×              |
| K <sub>2</sub> NbCuS <sub>4</sub>               | $Fddd$      | 1.9 (Nb-4d),<br>8.8 (Cu-3d) | 2.01              | -0.98              | 1.03           | 2.39              | -1.17                   | 1.22           |
| K <sub>2</sub> TaCuSe <sub>4</sub>              | $Fddd$      | 1.7 (Ta-5d), 8.9 (Cu-3d)    | 1.98              | -1.07              | 0.91           | 2.28              | -1.22                   | 1.06           |
| K <sub>3</sub> LaP <sub>2</sub> Se <sub>8</sub> | $P_1/c$     | None                        | 1.72              | -0.68              | 1.04           | —                 | —                       | —              |
| K <sub>3</sub> P <sub>11</sub>                  | $Pbcn$      | None                        | 1.93              | -0.71              | 1.22           | —                 | —                       | —              |
| K <sub>3</sub> PSe <sub>16</sub>                | $Fd\bar{3}$ | None                        | 1.12              | 0.15               | 1.26           | —                 | —                       | —              |
| K <sub>3</sub> PSe <sub>4</sub>                 | $Pnma$      | None                        | 1.68              | -1.09              | 0.60           | —                 | —                       | —              |
| K <sub>3</sub> VP <sub>2</sub> O <sub>8</sub>   | $P2_1/c$    | ×                           | 0.01              | 0.93               | 0.94           |                   | DFT incomplete          |                |
| K <sub>4</sub> P <sub>21</sub> I                | $Cmcm$      | None                        | 1.30              | -0.12              | 1.18           | —                 | —                       | —              |
| KBiP <sub>2</sub> Se <sub>6</sub>               | $P2_1/c$    | None                        | 1.64              | 0.27               | 1.91           | —                 | —                       | —              |
| KCoO <sub>2</sub>                               | $\bar{I}4$  | 6.4 (Co-3d), 8.0 (O-2p)     | 0.27              | 0.36               | 0.63           |                   | DFT+ $U$ incomplete     |                |
| KCuO <sub>2</sub>                               | $Cmcm$      | 11.1 (Cu-3d),<br>8.1 (O-2p) | 0.98              | 0.05               | 1.03           | 2.17              | -0.54                   | 1.63           |
| KL <sub>5</sub> C <sub>2</sub> Cl <sub>10</sub> | $P2_1/c$    | ×                           |                   | DFT incomplete     |                | ×                 | ×                       | ×              |

|                                                                 | Space group  | $U$ parameters (eV)                    | $\epsilon_g$ (eV) | DFT $eE_{CB}$ (eV) | $eE_{VB}$ (eV) | $\epsilon_g$ (eV) | DFT+ $U$ $eE_{CB}$ (eV) | $eE_{VB}$ (eV) |
|-----------------------------------------------------------------|--------------|----------------------------------------|-------------------|--------------------|----------------|-------------------|-------------------------|----------------|
| KNaZnO <sub>2</sub>                                             | $C2/c$       | ×                                      | 1.79              | -0.88              | 0.90           |                   | DFT incomplete          |                |
| La <sub>10</sub> Se <sub>14</sub> O                             | $I4_1/acd$   | 8.3 (O-2p)                             | 1.59              | -0.63              | 0.96           | 1.60              | -0.64                   | 0.96           |
| La <sub>4</sub> Mo <sub>2</sub> O <sub>11</sub>                 | $P4_2/n$     | ×                                      |                   | DFT incomplete     |                | ×                 | ×                       | ×              |
| La <sub>4</sub> Se <sub>3</sub> O <sub>4</sub>                  | $Amm2$       | 6.3 (O-2p)                             | 2.01              | -0.34              | 1.67           | 2.04              | -0.36                   | 1.68           |
| La <sub>6</sub> BN <sub>3</sub> O <sub>6</sub>                  | $Cmcm$       | 6.5 (N-2p), 8.4 (O-2p)                 | 1.10              | 0.20               | 1.29           | 1.81              | -0.16                   | 1.65           |
| LaCuS <sub>2</sub>                                              | $P2_1/c$     | 14.7 (Cu-3d)                           | 1.20              | -0.23              | 0.97           | 1.75              | -0.50                   | 1.25           |
| LaCuSeO                                                         | $P4/nmm$     | 15.6 (Cu-3d),<br>8.3 (O-2p)            | 1.48              | -0.20              | 1.29           | 2.44              | -0.68                   | 1.76           |
| LaCuSO                                                          | $P4/nmm$     | 15.5 (Cu-3d),<br>8.3 (O-2p)            | 1.70              | -0.24              | 1.46           | 2.65              | -0.71                   | 1.94           |
| LaSO                                                            | $Cmce$       | 8.3 (O-2p)                             | 1.56              | 0.04               | 1.60           | 1.57              | 0.03                    | 1.61           |
| LaTiNO <sub>2</sub>                                             | $I2_12_12_1$ | 5.9 (Ti-3d), 6.4 (N-2p),<br>8.4 (O-2p) | 1.36              | 0.24               | 1.60           | 2.42              | -0.28                   | 2.13           |
| Li <sub>2</sub> MnBr <sub>4</sub>                               | $Cmmm$       | ×                                      | 1.86              | -0.11              | 1.75           |                   | DFT incomplete          |                |
| Li <sub>3</sub> V <sub>2</sub> P <sub>3</sub> O <sub>12</sub>   | $P2_1/c$     | ×                                      | 0.03              | 1.38               | 1.42           |                   | DFT incomplete          |                |
| LiCoO <sub>2</sub>                                              | $R\bar{3}m$  | 6.1 (Co-3d), 8.4 (O-2p)                | 1.11              | 0.21               | 1.32           | 0.01              | 0.76                    | 0.77           |
| LiCuO                                                           | $I4/mmm$     | 12.4 (Cu-3d),<br>9.0 (O-2p)            | 1.49              | -0.52              | 0.97           | 2.42              | -0.98                   | 1.44           |
| LiVO <sub>2</sub>                                               | $R\bar{3}m$  | 3.8 (V-3d), 8.7 (O-2p)                 | 0.01              | 0.54               | 0.54           | 2.26              | -0.59                   | 1.67           |
| MgB <sub>9</sub> N                                              | $R\bar{3}m$  | 6.2 (N-2p)                             | 1.68              | -0.83              | 0.85           | 1.96              | -0.97                   | 0.99           |
| MgFe <sub>2</sub> O <sub>4</sub>                                | $Fd\bar{3}m$ | ×                                      | 0.01              | 1.27               | 1.28           |                   | DFT incomplete          |                |
| MgMoN <sub>2</sub>                                              | $P6_3/mmc$   | 6.8 (N-2p), 3.4 (Mo-4d)                | 0.90              | 0.39               | 1.29           | 0.71              | 0.49                    | 1.20           |
| MgTe <sub>2</sub>                                               | $Pa\bar{3}$  | None                                   | 1.08              | -0.15              | 0.94           | —                 | —                       | —              |
| Mn <sub>3</sub> V <sub>2</sub> O <sub>8</sub>                   | $I\bar{4}$   | 8.2 (Mn-3d), 5.9 (V-3d),<br>8.2 (O-2p) | 0.65              | 0.95               | 1.6            | 0.71              | 0.92                    | 1.63           |
| MnGa <sub>2</sub> S <sub>4</sub>                                | $I\bar{4}$   | 6.6 (Mn-3d)                            | 1.25              | -0.28              | 0.96           | 2.28              | -0.8                    | 1.48           |
| MnO                                                             | $R\bar{3}m$  | 7.0 (Mn-3d), 8.0 (O-2p)                | 0.01              | 0.85               | 0.86           | 2.30              | -0.29                   | 2.00           |
| Mo <sub>6</sub> PbI <sub>14</sub>                               | $Pn\bar{3}$  | ×                                      | 1.84              | 0.27               | 2.11           |                   | DFT incomplete          |                |
| MoS <sub>2</sub>                                                | $R\bar{3}m$  | 3.7 (Mo-4d)                            | 1.51              | 0.13               | 1.64           | 1.46              | 0.15                    | 1.62           |
| MoSe <sub>2</sub>                                               | $P\bar{3}m1$ | 3.8 (Mo-4d)                            | 1.44              | -0.02              | 1.41           | 1.24              | 0.07                    | 1.32           |
| Na <sub>2</sub> Sn <sub>2</sub> Se <sub>5</sub>                 | $Pbca$       | None                                   | 1.03              | -0.28              | 0.75           | —                 | —                       | —              |
| Na <sub>2</sub> TeO <sub>4</sub>                                | $P2_1/c$     | 8.7 (O-2p)                             | 1.39              | 0.32               | 1.71           | 3.30              | -0.63                   | 2.67           |
| Na <sub>3</sub> BiO <sub>4</sub>                                | $P2/c$       | 9.6 (O-2p)                             | 1.04              | 0.35               | 1.39           | 2.21              | -0.24                   | 1.98           |
| Na <sub>3</sub> Fe <sub>5</sub> O <sub>9</sub>                  | $C2/c$       | 6.3 (Fe-3d), 8.7 (O-2p)                | 0.00              | 0.85               | 0.86           | 3.57              | -0.93                   | 2.64           |
| Na <sub>3</sub> Mn <sub>4</sub> Te <sub>2</sub> O <sub>12</sub> | $Pnma$       | 8.3 (Mn-3d), 8.6 (O-2p)                | 0.05              | 1.10               | 1.15           |                   | DFT+ $U$ incomplete     |                |

|                                                   | Space group                    | $U$ parameters (eV)          | $\epsilon_g$ (eV) | DFT $eE_{CB}$ (eV) | $eE_{VB}$ (eV) | $\epsilon_g$ (eV) | DFT+ $U$ $eE_{CB}$ (eV) | $eE_{VB}$ (eV) |
|---------------------------------------------------|--------------------------------|------------------------------|-------------------|--------------------|----------------|-------------------|-------------------------|----------------|
| Na <sub>3</sub> WN <sub>3</sub>                   | <i>Cc</i>                      | 3.3 (W-5d), 6.3 (N-2p)       | 1.80              | -0.80              | 1.00           | 2.37              | -1.09                   | 1.29           |
| Na <sub>4</sub> Fe <sub>2</sub> O <sub>5</sub>    | <i>P2<sub>1</sub>/c</i>        | 6.5 (Fe-3d), 8.6 (O-2p)      | 0.03              | 0.27               | 0.31           | 3.80              | -1.61                   | 2.19           |
| Na <sub>4</sub> VP <sub>2</sub> O <sub>9</sub>    | <i>Pbca</i>                    | ×                            |                   | DFT incomplete     |                | ×                 | ×                       | ×              |
| Na <sub>5</sub> CoHO <sub>4</sub>                 | <i>Pnma</i>                    | ×                            |                   | DFT incomplete     |                | ×                 | ×                       | ×              |
| Na <sub>5</sub> CuH <sub>2</sub> O <sub>4</sub>   | <i>Pnma</i>                    | 13.0 (Cu-3d),<br>10.0 (O-2p) | 1.49              | -0.41              | 1.08           | 3.64              | -1.48                   | 2.16           |
| Na <sub>5</sub> NiO <sub>4</sub>                  | <i>Pbca</i>                    | ×                            | 0.53              | -0.31              | 0.22           |                   | DFT incomplete          |                |
| NaInO <sub>2</sub>                                | <i>R<math>\bar{3}m</math></i>  | 8.5 (Mo-4d)                  | 1.92              | -0.67              | 1.26           | 4.22              | -1.81                   | 2.4            |
| NaMnO <sub>2</sub>                                | <i>C2/m</i>                    | 4.9 (Mn-3d), 8.3 (O-2p)      | 1.16              | -0.07              | 1.10           | 2.60              | -0.78                   | 1.81           |
| NaMo <sub>6</sub> Br <sub>13</sub>                | <i>P<math>\bar{1}</math></i>   | 3.7 (Mo-4d)                  | 2.19              | 0.39               | 2.57           | 2.54              | 0.21                    | 2.75           |
| NaNbO <sub>2</sub>                                | <i>P6<sub>3</sub>/mmc</i>      | 1.9 (Nb-4d), 9.1 (O-2p)      | 1.43              | -0.11              | 1.32           | 2.07              | -0.43                   | 1.64           |
| Nb <sub>3</sub> Sb <sub>2</sub> Te <sub>5</sub>   | <i>I<math>\bar{4}3m</math></i> | 2.9 (Nb-4d)                  | 0.81              | 0.02               | 0.84           | 0.72              | 0.07                    | 0.79           |
| NbCu <sub>3</sub> S <sub>4</sub>                  | <i>P<math>\bar{4}3m</math></i> | 2.9 (Nb-4d),<br>13.9 (Cu-3d) | 1.81              | -0.14              | 1.67           | 1.97              | -0.22                   | 1.75           |
| Pb <sub>5</sub> S <sub>2</sub> I <sub>6</sub>     | <i>C2/m</i>                    | None                         | 1.89              | 0.02               | 1.91           | 1.89              | 0.02                    | 1.91           |
| PbO                                               | <i>Pbcm</i>                    | 8.1 (O-2p)                   | 1.81              | 0.08               | 1.89           | 2.83              | -0.43                   | 2.40           |
| Rb <sub>2</sub> MnCl <sub>4</sub>                 | <i>C2/m</i>                    | 6.7 (Mn-3d)                  | 1.34              | 0.04               | 1.39           | 3.70              | -1.14                   | 2.56           |
| Rb <sub>2</sub> NaMnO <sub>4</sub>                | <i>P2<sub>1</sub>/m</i>        | 8.2 (Mn-3d), 8.9 (O-2p)      | 1.23              | -0.49              | 0.74           | 1.08              | -0.42                   | 0.66           |
| Rb <sub>4</sub> Cu <sub>5</sub> Cl <sub>9</sub>   | <i>Pc</i>                      | ×                            |                   | DFT incomplete     |                | ×                 | ×                       | ×              |
| Rb <sub>4</sub> P <sub>2</sub> I                  | <i>Cmcm</i>                    | None                         | 1.39              | -0.19              | 1.20           | —                 | —                       | —              |
| Rb <sub>4</sub> Ta <sub>2</sub> S <sub>11</sub>   | <i>Pca2<sub>1</sub></i>        | 2.7 (Ta-5d)                  | 1.75              | -0.61              | 1.14           |                   | DFT+ $U$ incomplete     |                |
| Rb <sub>4</sub> Ti <sub>3</sub> S <sub>14</sub>   | <i>C2/c</i>                    | 5.4 (Ti-3d)                  | 1.27              | -0.33              | 0.94           | 2.11              | -0.75                   | 1.36           |
| Rb <sub>4</sub> Zr <sub>3</sub> Se <sub>14</sub>  | <i>C2/c</i>                    | 2.6 (Zr-4d)                  | 1.50              | -0.58              | 0.92           | 1.67              | -0.66                   | 1.01           |
| Rb <sub>6</sub> Ta <sub>4</sub> S <sub>25</sub>   | <i>P1</i>                      | 2.7 (Ta-5d)                  | 1.47              | -0.16              | 1.31           | 1.47              | -0.16                   | 1.31           |
| RbCuO <sub>2</sub>                                | <i>Cmcm</i>                    | 11.2 (Cu-3d),<br>8.1 (O-2p)  | 1.03              | -0.01              | 1.01           | 2.23              | -0.61                   | 1.62           |
| Sb <sub>2</sub> S <sub>3</sub>                    | <i>Pnma</i>                    | None                         | 1.31              | 0.54               | 1.85           | —                 | —                       | —              |
| SbPb <sub>2</sub> S <sub>2</sub> I <sub>3</sub>   | <i>P2<sub>1</sub>/c</i>        | None                         | 1.81              | 0.19               | 2.00           | —                 | —                       | —              |
| SiP                                               | <i>Cmc2<sub>1</sub></i>        | None                         | 1.75              | -0.14              | 1.62           | —                 | —                       | —              |
| SiP <sub>2</sub>                                  | <i>Pbam</i>                    | None                         | 1.42              | 0.17               | 1.59           | —                 | —                       | —              |
| SnS                                               | <i>Pnma</i>                    | None                         | 1.14              | 0.16               | 1.30           | —                 | —                       | —              |
| SnS <sub>2</sub>                                  | <i>P<math>\bar{3}m1</math></i> | None                         | 1.53              | 0.30               | 1.83           | —                 | —                       | —              |
| St <sub>17</sub> Ta <sub>10</sub> S <sub>42</sub> | <i>P1</i>                      | ×                            |                   | DFT incomplete     |                | ×                 | ×                       | ×              |

|                                               | Space group  | $U$ parameters (eV)                      | $\epsilon_g$ (eV) | DFT $eE_{CB}$ (eV) | $eE_{VB}$ (eV) | $\epsilon_g$ (eV) | DFT+ $U$ $eE_{CB}$ (eV) | $eE_{VB}$ (eV) |
|-----------------------------------------------|--------------|------------------------------------------|-------------------|--------------------|----------------|-------------------|-------------------------|----------------|
| $\text{Sr}_2\text{Fe}_2\text{S}_2\text{OF}_2$ | $I4/mmm$     | 6.9 (Fe-3d), 8.9 (O-2p)                  | 0.07              | 0.56               | 0.63           | 0.19              | 0.50                    | 0.69           |
| $\text{Sr}_2\text{FeBrO}_3$                   | $P4/nmm$     | 7.4 (Fe-3d), 8.9 (O-2p)                  | 0.04              | 0.27               | 0.31           | 3.17              | -1.30                   | 1.87           |
| $\text{Sr}_2\text{FeClO}_3$                   | $P4/nmm$     | 7.2 (Fe-3d), 8.9 (O-2p)                  | 0.05              | 0.32               | 0.37           | 3.18              | -1.24                   | 1.94           |
| $\text{Sr}_2\text{FeO}_3\text{F}$             | $P4/nmm$     | 7.6 (Fe-3d), 9.0 (O-2p)                  | 0.04              | 0.49               | 0.53           | 3.07              | -1.03                   | 2.04           |
| $\text{Sr}_2\text{PbO}_4$                     | $Pbam$       | 9.0 (O-2p)                               | 1.43              | -0.46              | 0.97           | 2.31              | -0.90                   | 1.41           |
| $\text{Sr}_2\text{SnSe}_3\text{F}_2$          | $Pnma$       | None                                     | 1.45              | -0.18              | 1.27           | —                 | —                       | —              |
| $\text{Sr}_4\text{Mn}_3\text{O}_{10}$         | $P222_1$     | 7.2 (Mn-3d), 9.0 (O-2p)                  | 0.91              | -0.02              | 0.89           | 0.69              | 0.08                    | 0.78           |
| $\text{Sr}_6\text{Sb}_6\text{S}_{17}$         | $P2_12_12_1$ | ×                                        |                   | DFT incomplete     |                | ×                 | ×                       | ×              |
| $\text{SrCu}_2\text{O}_2$                     | $I4_1/amd$   | 12.8 (Cu-3d),<br>8.3 (O-2p)              | 1.81              | -0.65              | 1.16           | 3.11              | -1.30                   | 1.81           |
| $\text{SrCuSeF}$                              | $P4/nmm$     | 16.2 (Cu-3d)                             | 1.15              | -0.17              | 0.98           | 2.26              | -0.73                   | 1.53           |
| $\text{SrCuSF}$                               | $P4/nmm$     | 16.1 (Cu-3d)                             | 1.45              | -0.26              | 1.20           | 2.73              | -0.89                   | 1.83           |
| $\text{SrIn}_2\text{O}_4$                     | $Pnma$       | 8.8 (O-2p)                               | 1.83              | -0.52              | 1.31           | 3.93              | -1.56                   | 2.36           |
| $\text{Te}_2\text{Mo}$                        | $P6_3/mmc$   | 3.6 (Mo-4d)                              | 1.01              | -0.05              | 0.96           | 0.93              | 0.00                    | 0.92           |
| $\text{TiPbO}_3$                              | $P4mm$       | 6.3 (Ti-3d), 8.1 (O-2p)                  | 2.08              | 0.17               | 2.25           | 3.45              | -0.51                   | 2.94           |
| $\text{V}_3\text{Pb}_2\text{O}_{12}$          | $P2/c$       | 5.7 (V-3d), 7.8 (O-2p)                   | 0.49              | 1.11               | 1.60           | 2.75              | -0.02                   | 2.72           |
| $\text{VCu}_3\text{Se}_4$                     | $P\bar{4}3m$ | 5.1 (V-3d), 13.2 (Cu-3d)                 | 0.99              | 0.06               | 1.05           | 1.40              | -0.14                   | 1.26           |
| $\text{VO}$                                   | $Fm\bar{3}m$ | ×                                        |                   | DFT incomplete     |                | ×                 | ×                       | ×              |
| $\text{WS}_2$                                 | $P6_3/mmc$   | 3.2 (W-5d)                               | 1.66              | 0.27               | 1.93           | 1.71              | 0.25                    | 1.96           |
| $\text{WSe}_2$                                | $P6_3/mmc$   | 3.2 (W-5d)                               | 1.52              | 0.14               | 1.67           | 1.36              | 0.23                    | 1.59           |
| $\text{YCuS}_2$                               | $Pnma$       | 15.1 (Cu-3d)                             | 1.63              | -0.41              | 1.23           | 2.18              | -0.68                   | 1.50           |
| $\text{ZnCo}_2\text{O}_4$                     | $Fd\bar{3}m$ | ×                                        |                   | DFT incomplete     |                | ×                 | ×                       | ×              |
| $\text{ZnFe}_2\text{O}_4$                     | $Fd\bar{3}m$ | 15.3 (Zn-3d),<br>6.2 (Fe-3d), 8.6 (O-2p) | 0.01              | 1.41               | 1.43           | 3.60              | -0.38                   | 3.22           |
| $\text{ZnGeP}_2$                              | $I\bar{4}2d$ | None                                     | 1.27              | -0.03              | 1.24           | —                 | —                       | —              |
| $\text{ZnP}_2$                                | $P4_32_12$   | None                                     | 1.50              | 0.01               | 1.51           | —                 | —                       | —              |
| $\text{ZnSe}$                                 | $F\bar{4}3m$ | None                                     | 1.47              | -0.05              | 1.42           | —                 | —                       | —              |
| $\text{ZnTe}$                                 | $F\bar{4}3m$ | None                                     | 1.32              | -0.16              | 1.16           | —                 | —                       | —              |



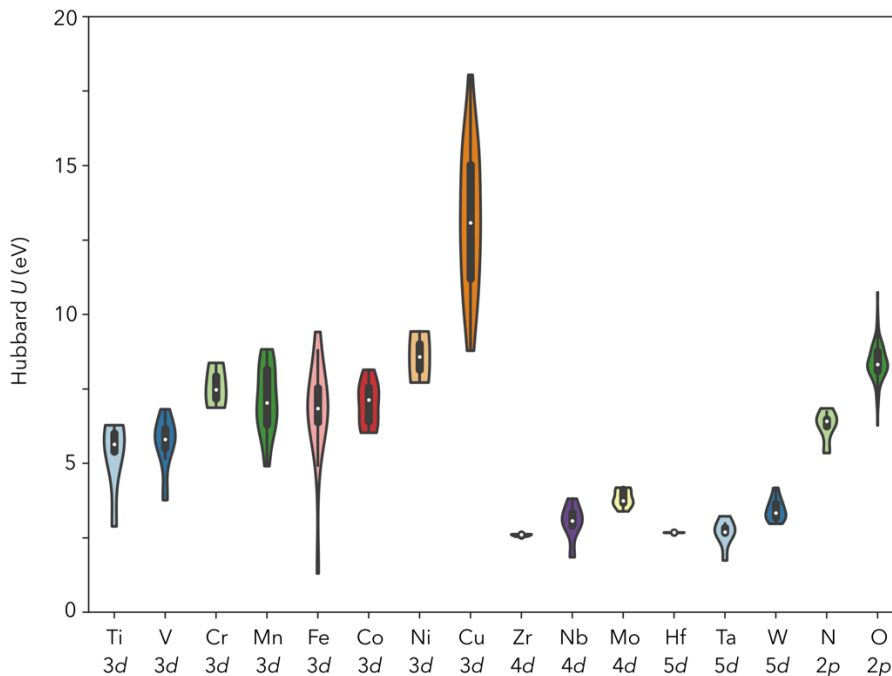

**Figure S3** Distributions of the Hubbard  $U$  parameters for the transition-metal, carbon, nitrogen and oxygen elements. The  $U$  parameters are computed from first principles using DFPT,<sup>1</sup> with orthogonalized atomic orbitals as projectors on the Hubbard manifold. The distributions illustrate the gradual increase in the  $U$  parameters across the transition-metal series, following electronegativity trends. It is noted that the  $U$  parameters of Cu present higher values compared to other elements. This observation is due to the fact that the Cu-3d electronic shell is closed.<sup>4</sup> The variance of the  $U$  parameters is the largest for iron and copper cations. In contrast, the distribution of  $U$  parameters of the oxygen anion is narrow. In light of this statistical results, we performed a sensitivity analysis of the computed band gap  $\varepsilon_g$  as a function of the  $U$  parameter for the cuprous compounds (listed in Table 2 of the main text), finding an average decrease in  $\varepsilon_g$  of 0.09 eV when reducing  $U(\text{Cu-}3d)$  by 1 eV.  $\text{Cu}_2\text{WS}_4$  and  $\text{Na}_5\text{CuH}_2\text{O}_4$  exhibited the lowest sensitivity (0.03 eV per 1 eV) and highest sensitivity (0.16 eV per 1 eV) to the  $U(\text{Cu-}3d)$  parameter, respectively. This assessment suggests that although the  $U(\text{Cu-}3d)$  parameters are quite large and widely distributed, they do not translate into unexpectedly strong or unreasonably sensitive Hubbard  $U$  corrections to the original (DFT) band gaps.

<sup>4</sup> Yu, Carter, *The Journal of Chemical Physics* **140**, 121105 (2014).

**Table S2** Identification number, formation energies, and band gaps from the Materials Project (MP) for the 162 candidate photocatalysts. The formation energies and band gaps are evaluated at the DFT/DFT+ $U$  level with fixed  $U$  parameters (DFT+ $U_{MP}$ ) using the VASP (Vienna Ab initio Simulation Package) code.<sup>5,6</sup> The  $U_{MP}$  parameters are optimally tuned to reproduce experimental formation enthalpies: 3.3 (V-3 $d$ ), 3.7 (Cr-3 $d$ ), 3.9 (Mn-3 $d$ ), 5.3 (Fe-3 $d$ ), 3.3 (Co-3 $d$ ), 6.2 eV (Ni-3 $d$ ).<sup>7,8</sup> It is important to note that some of the  $U_{MP}$  parameters are far from those computed in this work from first principles. This is because  $U$  depends on numerical and physical parameters, such as the pseudopotentials [GBRV ultrasoft pseudopotentials<sup>9</sup> are used in this work, while projected augmented-wave (PAW) pseudopotentials<sup>10</sup> are used in the Materials Project], the localized functions of the Hubbard projectors (orthogonalized atomic orbitals are used in this work while PAW projector functions are used in VASP), and the chemical environments of the elements. Hence,  $U$  is in general not transferable. The elements in the chemical formula are ordered by increasing electronegativity, following the naming convention of the Materials Project.

|                                                                 | Space group  | MP identity number | Formation energy (eV/atom) | DFT+ $U_{MP}$ $\epsilon_g$ (eV) |
|-----------------------------------------------------------------|--------------|--------------------|----------------------------|---------------------------------|
| AlCuO <sub>2</sub>                                              | $R\bar{3}m$  | 3748               | -2.42                      | 1.82                            |
| Ba <sub>2</sub> Fe <sub>2</sub> O <sub>5</sub>                  | $P2_1/c$     | 1196071            | -2.41                      | 1.42                            |
| Ba <sub>2</sub> In <sub>2</sub> S <sub>5</sub>                  | $Pbca$       | 22841              | -1.67                      | 1.99                            |
| Ba <sub>2</sub> PbO <sub>4</sub>                                | $I4/mmm$     | 20098              | -2.38                      | 1.22                            |
| Ba <sub>2</sub> SnSe <sub>3</sub> F <sub>2</sub>                | $Pnma$       | 17805              | -2.26                      | 1.72                            |
| Ba <sub>3</sub> MnNb <sub>2</sub> O <sub>9</sub>                | $P\bar{3}m1$ | 20921              | -3.14                      | 1.77                            |
| Ba <sub>3</sub> Zn <sub>5</sub> In <sub>2</sub> O <sub>11</sub> | $F\bar{4}3m$ | 560544             | -2.19                      | 1.62                            |
| Ba <sub>6</sub> Mn <sub>5</sub> O <sub>16</sub>                 | $Cmce$       | 30895              | -2.42                      | 1.30                            |
| Ba <sub>6</sub> V <sub>4</sub> S <sub>11</sub> O <sub>5</sub>   | $Pnma$       | 556461             | -2.09                      | 1.91                            |
| Ba <sub>8</sub> Sb <sub>6</sub> S <sub>17</sub>                 | $P2/c$       | 561455             | -1.62                      | 1.39                            |
| BaAlSi <sub>5</sub> N <sub>7</sub> O <sub>2</sub>               | $P1$         | 1227994            | -1.82                      | 1.51                            |
| BaCaFe <sub>4</sub> O <sub>8</sub>                              | $P\bar{3}1m$ | 18950              | -1.43                      | 1.78                            |
| BaCu <sub>2</sub> O <sub>2</sub>                                | $I4_1/amd$   | 7374               | -1.62                      | 1.38                            |
| BaHfN <sub>2</sub>                                              | $P4/nmm$     | 10322              | -1.53                      | 1.25                            |
| BaIn <sub>2</sub> O <sub>4</sub>                                | $P2_1/c$     | 578629             | -2.27                      | 1.67                            |
| BaS <sub>2</sub>                                                | $C2/c$       | 684                | -1.86                      | 1.58                            |
| BaSbSe <sub>2</sub> F                                           | $P\bar{1}$   | 558946             | -1.81                      | 1.33                            |
| BaSnS <sub>2</sub>                                              | $P2_1/c$     | 12181              | -1.63                      | 1.64                            |
| Ca <sub>12</sub> Al <sub>14</sub> O <sub>33</sub>               | $C2$         | 530149             | -3.45                      | 1.97                            |
| Ca <sub>2</sub> CoO <sub>3</sub>                                | $Cm$         | 1182074            | -2.45                      | 1.75                            |

<sup>5</sup> Kresse, Furthmüller, *Computational Materials Science* **6**, 15-50 (1996).

<sup>6</sup> Kresse, Furthmüller, *Physical Review B* **54**, 11169 (1996).

<sup>7</sup> Jain *et al.*, *Physical Review B* **84**, 045115 (2011).

<sup>8</sup> Wang, Maxisch, Ceder, *Physical Review B* **73**, 195107 (2006).

<sup>9</sup> Garrity, Bennett, Rabe, Vanderbilt, *Computational Materials Science* **81**, 446-452 (2014).

<sup>10</sup> Kresse, Joubert *Physical Review B* **59**, 1758 (1999).

|                                                   | Space group                                     | MP identity number | Formation energy (eV/atom) | DFT+ $U_{MP}$ $\epsilon_g$ (eV) |
|---------------------------------------------------|-------------------------------------------------|--------------------|----------------------------|---------------------------------|
| Ca <sub>2</sub> FeClO <sub>3</sub>                | <i>P4/nmm</i>                                   | 630511             | -2.41                      | 0.99                            |
| Ca <sub>2</sub> PbO <sub>4</sub>                  | <i>Pbam</i>                                     | 21137              | -2.56                      | 1.48                            |
| Ca <sub>3</sub> PbCl <sub>3</sub>                 | <i>Pm<math>\bar{3}m</math></i>                  | 29342              | -2.27                      | 1.84                            |
| CaFeClO <sub>2</sub>                              | <i>C2/m</i>                                     | 549711             | -2.00                      | 2.00                            |
| CaIn <sub>2</sub> O <sub>4</sub>                  | <i>Fd<math>\bar{3}m</math></i>                  | 22766              | -2.40                      | 1.92                            |
| CaSb <sub>10</sub> S <sub>6</sub> O <sub>10</sub> | <i>C2/c</i>                                     | 504882             | -1.49                      | 1.75                            |
| CaTaNO <sub>2</sub>                               | <i>Pmc2<sub>1</sub></i>                         | 556340             | -2.76                      | 1.61                            |
| CoPb <sub>2</sub> WO <sub>6</sub>                 | <i>C2/m</i>                                     | 20069              | -1.78                      | 1.78                            |
| Cr <sub>3</sub> BO <sub>6</sub>                   | <i>Pnma</i>                                     | 18551              | -2.32                      | 1.60                            |
| CrPb <sub>5</sub> O <sub>8</sub>                  | <i>P2<sub>1</sub>/c</i>                         | 705034             | -1.61                      | 1.88                            |
| Cs <sub>4</sub> Ta <sub>2</sub> S <sub>11</sub>   | <i>Pca2<sub>1</sub></i>                         | 14578              | -1.39                      | 1.81                            |
| Cs <sub>4</sub> Ti <sub>3</sub> S <sub>14</sub>   | <i>C2/c</i>                                     | 542011             | -1.46                      | 1.29                            |
| Cs <sub>4</sub> Zr <sub>3</sub> Se <sub>14</sub>  | <i>C2/c</i>                                     | 768674             | -1.05                      | 1.51                            |
| CsCuO <sub>2</sub>                                | <i>Cmcm</i>                                     | 553310             | -1.36                      | 0.94                            |
| CsGeI <sub>3</sub>                                | <i>R3m</i>                                      | 28377              | -0.83                      | 1.59                            |
| CsLaNb <sub>2</sub> O <sub>7</sub>                | <i>P4/mmm</i>                                   | 553248             | -3.21                      | 1.44                            |
| CsMnBr <sub>3</sub>                               | <i>P6<sub>3</sub>/mmc</i>                       | 23048              | -0.82                      | 1.29                            |
| CsMnI <sub>3</sub>                                | <i>P6<sub>3</sub>/mmc</i>                       | 540609             | -0.47                      | 1.02                            |
| CsSbS <sub>2</sub>                                | <i>P2<sub>1</sub>/c</i>                         | 561639             | -1.05                      | 1.84                            |
| Cu <sub>2</sub> WS <sub>4</sub>                   | <i>P<math>\bar{4}2m</math></i>                  | 8976               | -0.84                      | 1.45                            |
| Cu <sub>3</sub> SbS <sub>3</sub>                  | <i>P2<sub>1</sub>2<sub>1</sub>2<sub>1</sub></i> | 17691              | -0.48                      | 1.00                            |
| CuI                                               | <i>P3m1</i>                                     | 570136             | -0.15                      | 1.63                            |
| CuP <sub>2</sub>                                  | <i>P2<sub>1</sub>/c</i>                         | 927                | -0.11                      | 0.86                            |
| Fe <sub>3</sub> BO <sub>6</sub>                   | <i>Pnma</i>                                     | 22774              | -1.61                      | 1.79                            |
| FeNi <sub>2</sub> BO <sub>5</sub>                 | <i>Pbam</i>                                     | 21522              | -1.76                      | 1.85                            |
| Ga <sub>2</sub> TeSe <sub>2</sub>                 | <i>I4<sub>1</sub>md</i>                         | 28423              | -0.51                      | 1.61                            |
| GaCuI <sub>4</sub>                                | <i>I<math>\bar{4}</math></i>                    | 29403              | -0.41                      | 1.70                            |
| GaCuO <sub>2</sub>                                | <i>R<math>\bar{3}m</math></i>                   | 4280               | -1.68                      | 0.98                            |
| GaN                                               | <i>P6<sub>3</sub>mc</i>                         | 804                | -0.67                      | 1.74                            |
| GaS                                               | <i>P6<sub>3</sub>/mmc</i>                       | 2507               | -0.98                      | 1.88                            |

|                                                  | Space group                                                        | MP identity number | Formation energy (eV/atom) | DFT+ $U_{MP}$ $\epsilon_g$ (eV) |
|--------------------------------------------------|--------------------------------------------------------------------|--------------------|----------------------------|---------------------------------|
| Ge <sub>4</sub> Se <sub>9</sub>                  | <i>Pca2</i> <sub>1</sub>                                           | 680333             | -0.21                      | 1.22                            |
| GeI <sub>4</sub>                                 | <i>Pa</i> $\bar{3}$                                                | 23266              | -0.27                      | 2.00                            |
| GeS                                              | <i>Pnma</i>                                                        | 2242               | -0.58                      | 1.24                            |
| GeSe                                             | <i>Pnma</i>                                                        | 700                | -0.17                      | 0.90                            |
| GeSe <sub>2</sub>                                | <i>P2</i> <sub>1</sub> / <i>c</i>                                  | 540625             | -0.23                      | 1.44                            |
| GeTe                                             | <i>R3m</i>                                                         | 938                | -0.09                      | 0.75                            |
| In <sub>2</sub> O <sub>3</sub>                   | <i>I2</i> <sub>1</sub> <i>3</i>                                    | 22598              | -2.01                      | 0.93                            |
| In <sub>4</sub> Bi <sub>2</sub> S <sub>9</sub>   | <i>P2</i> <sub>1</sub> / <i>m</i>                                  | 27195              | -0.87                      | 1.63                            |
| InBr                                             | <i>Cmcm</i>                                                        | 22870              | -0.67                      | 1.26                            |
| InI                                              | <i>Cmcm</i>                                                        | 23202              | -0.47                      | 1.34                            |
| InSb <sub>2</sub> S <sub>4</sub> Br              | <i>C2</i> / <i>m</i>                                               | 559864             | -0.75                      | 1.52                            |
| InSb <sub>2</sub> S <sub>4</sub> Cl              | <i>C2</i> / <i>m</i>                                               | 556541             | -0.87                      | 1.51                            |
| InSb <sub>2</sub> Se <sub>4</sub> Br             | <i>P</i> $\bar{1}$                                                 | 570321             | -0.41                      | 1.13                            |
| K <sub>2</sub> CoCl <sub>4</sub>                 | <i>Pna2</i> <sub>1</sub>                                           | 23515              | -1.74                      | 0.89                            |
| K <sub>2</sub> NbCuS <sub>4</sub>                | <i>Fddd</i>                                                        | 9763               | -1.38                      | 1.96                            |
| K <sub>2</sub> TaCuSe <sub>4</sub>               | <i>Fddd</i>                                                        | 8972               | -0.95                      | 1.98                            |
| K <sub>3</sub> LaP <sub>2</sub> Se <sub>8</sub>  | <i>P</i> <sub>1</sub> / <i>c</i>                                   | 542079             | -0.93                      | 1.46                            |
| K <sub>3</sub> P <sub>11</sub>                   | <i>Pbcn</i>                                                        | 1568               | -0.32                      | 1.93                            |
| K <sub>3</sub> PSe <sub>16</sub>                 | <i>Fd</i> - $\bar{3}$                                              | 29947              | -0.34                      | 1.09                            |
| K <sub>3</sub> PSe <sub>4</sub>                  | <i>Pnma</i>                                                        | 31313              | -0.87                      | 1.83                            |
| K <sub>3</sub> VP <sub>2</sub> O <sub>8</sub>    | <i>P2</i> <sub>1</sub> / <i>c</i>                                  | 557046             | -2.54                      | 1.98                            |
| K <sub>4</sub> P <sub>2</sub> I                  | <i>Cmcm</i>                                                        | 31280              | -0.30                      | 1.34                            |
| KBiP <sub>2</sub> Se <sub>6</sub>                | <i>P2</i> <sub>1</sub> / <i>c</i>                                  | 569435             | -0.40                      | 1.61                            |
| KCoO <sub>2</sub>                                | <i>I</i> $\bar{4}$                                                 | 1180771            | -1.58                      | 0.99                            |
| KCuO <sub>2</sub>                                | <i>Cmcm</i>                                                        | 3982               | -1.39                      | 0.86                            |
| KLa <sub>5</sub> C <sub>2</sub> Cl <sub>10</sub> | <i>P2</i> <sub>1</sub> / <i>c</i>                                  | 571240             | -2.32                      | 1.94                            |
| KNaZnO <sub>2</sub>                              | <i>C2</i> / <i>c</i>                                               | 557183             | -1.64                      | 1.78                            |
| KV <sub>3</sub> P <sub>4</sub> O <sub>17</sub>   | <i>P2</i> <sub>1</sub> <i>2</i> <sub>1</sub> <i>2</i> <sub>1</sub> | 14929              | -2.61                      | 1.16                            |
| La <sub>10</sub> Se <sub>14</sub> O              | <i>I4</i> <sub>1</sub> / <i>acd</i>                                | 558535             | -2.18                      | 1.55                            |
| La <sub>4</sub> Mo <sub>2</sub> O <sub>11</sub>  | <i>P4</i> <sub>2</sub> / <i>n</i>                                  | 14748              | -3.18                      | 1.82                            |

|                                                                 | Space group                                     | MP identity number | Formation energy (eV/atom) | DFT+ $U_{MP}$ $\epsilon_g$ (eV) |
|-----------------------------------------------------------------|-------------------------------------------------|--------------------|----------------------------|---------------------------------|
| La <sub>4</sub> Se <sub>3</sub> O <sub>4</sub>                  | <i>Amm2</i>                                     | 4412               | -3.13                      | 1.33                            |
| La <sub>6</sub> BN <sub>3</sub> O <sub>6</sub>                  | <i>Cmcm</i>                                     | 560824             | -3.02                      | 1.10                            |
| LaCuS <sub>2</sub>                                              | <i>P2<sub>1</sub>/c</i>                         | 4841               | -1.80                      | 1.23                            |
| LaCuSeO                                                         | <i>P4/nmm</i>                                   | 552488             | -2.20                      | 1.55                            |
| LaCuSO                                                          | <i>P4/nmm</i>                                   | 6088               | -2.40                      | 1.67                            |
| LaSO                                                            | <i>Cmce</i>                                     | 28626              | -3.11                      | 1.52                            |
| LaTiNO <sub>2</sub>                                             | <i>I2<sub>1</sub>2<sub>1</sub>2<sub>1</sub></i> | 1222738            | -3.06                      | 1.21                            |
| Li <sub>2</sub> MnBr <sub>4</sub>                               | <i>Cmmm</i>                                     | 28250              | -1.23                      | 1.78                            |
| Li <sub>3</sub> V <sub>2</sub> P <sub>3</sub> O <sub>12</sub>   | <i>P2<sub>1</sub>/c</i>                         | 757321             | -2.71                      | 1.92                            |
| LiCoO <sub>2</sub>                                              | <i>R<math>\bar{3}m</math></i>                   | 22526              | -1.59                      | 0.66                            |
| LiCuO                                                           | <i>I4/mmm</i>                                   | 5127               | -1.44                      | 1.44                            |
| LiVO <sub>2</sub>                                               | <i>R<math>\bar{3}m</math></i>                   | 19340              | -2.50                      | 1.79                            |
| MgB <sub>9</sub> N                                              | <i>R<math>\bar{3}m</math></i>                   | 30091              | -0.43                      | 1.68                            |
| MgFe <sub>2</sub> O <sub>4</sub>                                | <i>Fd<math>\bar{3}m</math></i>                  | 608016             | -2.25                      | 1.80                            |
| MgMoN <sub>2</sub>                                              | <i>P6<sub>3</sub>/mmc</i>                       | 864954             | -1.06                      | 0.74                            |
| MgTe <sub>2</sub>                                               | <i>Pa<math>\bar{3}</math></i>                   | 2604               | -0.58                      | 1.12                            |
| Mn <sub>3</sub> V <sub>2</sub> O <sub>8</sub>                   | <i>I<math>\bar{4}</math></i>                    | 1221916            | -2.28                      | 1.92                            |
| MnGa <sub>2</sub> S <sub>4</sub>                                | <i>I<math>\bar{4}</math></i>                    | 20025              | -1.04                      | 1.18                            |
| MnNi <sub>6</sub> O <sub>8</sub>                                | <i>Fm<math>\bar{3}m</math></i>                  | 19442              | -1.22                      | 1.31                            |
| MnO                                                             | <i>R<math>\bar{3}m</math></i>                   | 19006              | -1.99                      | 1.68                            |
| Mo <sub>6</sub> PbI <sub>14</sub>                               | <i>Pn<math>\bar{3}</math></i>                   | 569225             | -0.44                      | 1.84                            |
| MoS <sub>2</sub>                                                | <i>R3m</i>                                      | 1434               | -1.31                      | 1.20                            |
| MoSe <sub>2</sub>                                               | <i>P<math>\bar{3}m1</math></i>                  | 1027692            | -0.67                      | 1.14                            |
| Na <sub>2</sub> Sn <sub>2</sub> Se <sub>5</sub>                 | <i>Pbca</i>                                     | 16167              | -0.63                      | 1.02                            |
| Na <sub>2</sub> TeO <sub>4</sub>                                | <i>P2<sub>1</sub>/c</i>                         | 560613             | -1.83                      | 1.81                            |
| Na <sub>3</sub> BiO <sub>4</sub>                                | <i>P2/c</i>                                     | 27345              | -1.74                      | 0.96                            |
| Na <sub>3</sub> Fe <sub>5</sub> O <sub>9</sub>                  | <i>C2/c</i>                                     | 540658             | -1.34                      | 1.72                            |
| Na <sub>3</sub> Mn <sub>4</sub> Te <sub>2</sub> O <sub>12</sub> | <i>Pnma</i>                                     | 561325             | -1.93                      | 1.45                            |
| Na <sub>3</sub> WN <sub>3</sub>                                 | <i>Cc</i>                                       | 16839              | -0.63                      | 1.77                            |
| Na <sub>4</sub> Fe <sub>2</sub> O <sub>5</sub>                  | <i>P2<sub>1</sub>/c</i>                         | 19396              | -1.34                      | 1.92                            |

|                                                                | Space group                    | MP identity number | Formation energy (eV/atom) | DFT+ $U_{MP}$ $\epsilon_g$ (eV) |
|----------------------------------------------------------------|--------------------------------|--------------------|----------------------------|---------------------------------|
| Na <sub>4</sub> VP <sub>2</sub> O <sub>9</sub>                 | <i>Pbca</i>                    | 705037             | -2.61                      | 1.76                            |
| Na <sub>5</sub> CoHO <sub>4</sub>                              | <i>Pnma</i>                    | 774341             | -1.49                      | 1.68                            |
| Na <sub>5</sub> CuH <sub>2</sub> O <sub>4</sub>                | <i>Pnma</i>                    | 757878             | -1.49                      | 1.49                            |
| Na <sub>5</sub> NiO <sub>4</sub>                               | <i>Pbca</i>                    | 21996              | -1.39                      | 1.91                            |
| NaInO <sub>2</sub>                                             | <i>R<math>\bar{3}m</math></i>  | 5175               | -2.00                      | 1.91                            |
| NaMnO <sub>2</sub>                                             | <i>C2/m</i>                    | 18957              | -2.04                      | 1.26                            |
| NaMo <sub>6</sub> Br <sub>13</sub>                             | <i>P<math>\bar{1}</math></i>   | 680472             | -0.77                      | 2.00                            |
| NaNbO <sub>2</sub>                                             | <i>P6<sub>3</sub>/mmc</i>      | 3744               | -2.54                      | 1.38                            |
| Nb <sub>3</sub> Sb <sub>2</sub> Te <sub>5</sub>                | <i>I<math>\bar{4}3m</math></i> | 569571             | -0.40                      | 0.84                            |
| NbCu <sub>3</sub> S <sub>4</sub>                               | <i>P<math>\bar{4}3m</math></i> | 5621               | -0.93                      | 1.66                            |
| Pb <sub>5</sub> S <sub>2</sub> I <sub>6</sub>                  | <i>C2/m</i>                    | 23066              | -0.70                      | 1.81                            |
| PbO                                                            | <i>Pbcm</i>                    | 672237             | -1.48                      | 1.47                            |
| Rb <sub>2</sub> MnCl <sub>4</sub>                              | <i>C2/m</i>                    | 22978              | -1.94                      | 1.29                            |
| Rb <sub>2</sub> NaMnO <sub>4</sub>                             | <i>P2<sub>1</sub>/m</i>        | 18873              | -1.83                      | 1.81                            |
| Rb <sub>4</sub> Cu <sub>5</sub> Cl <sub>9</sub>                | <i>Pc</i>                      | 29449              | -1.41                      | 1.79                            |
| Rb <sub>4</sub> P <sub>21</sub> I                              | <i>Cmcm</i>                    | 31279              | -0.31                      | 1.43                            |
| Rb <sub>4</sub> Ti <sub>3</sub> S <sub>14</sub>                | <i>C2/c</i>                    | 542067             | -1.45                      | 1.22                            |
| Rb <sub>4</sub> Zr <sub>3</sub> Se <sub>14</sub>               | <i>C2/c</i>                    | 542013             | -1.03                      | 1.46                            |
| Rb <sub>6</sub> Ta <sub>4</sub> S <sub>25</sub>                | <i>P1</i>                      | 680284             | -1.26                      | 1.48                            |
| RbCuO <sub>2</sub>                                             | <i>Cmcm</i>                    | 7467               | -1.37                      | 0.91                            |
| Sb <sub>2</sub> S <sub>3</sub>                                 | <i>Pnma</i>                    | 2809               | -0.65                      | 1.28                            |
| SbPb <sub>2</sub> S <sub>2</sub> I <sub>3</sub>                | <i>P2<sub>1</sub>/c</i>        | 578882             | -0.66                      | 1.72                            |
| SiP                                                            | <i>Cmc2<sub>1</sub></i>        | 2798               | -0.14                      | 1.74                            |
| SiP <sub>2</sub>                                               | <i>Pbam</i>                    | 9996               | -0.13                      | 1.42                            |
| SnS                                                            | <i>Pnma</i>                    | 2231               | -0.78                      | 0.91                            |
| SnS <sub>2</sub>                                               | <i>P<math>\bar{3}m1</math></i> | 1170               | -0.82                      | 1.56                            |
| Sr <sub>17</sub> Ta <sub>10</sub> S <sub>42</sub>              | <i>P1</i>                      | 532315             | -1.96                      | 1.79                            |
| Sr <sub>2</sub> Fe <sub>2</sub> S <sub>2</sub> OF <sub>2</sub> | <i>I4/mmm</i>                  | 549237             | -2.55                      | 1.90                            |
| Sr <sub>2</sub> FeBrO <sub>3</sub>                             | <i>P4/nmm</i>                  | 556507             | -2.56                      | 1.35                            |
| Sr <sub>2</sub> FeClO <sub>3</sub>                             | <i>P4/nmm</i>                  | 630641             | -2.72                      | 1.12                            |

|                                                  | Space group                                     | MP identity number | Formation energy (eV/atom) | DFT+ $U_{MP}$ $\epsilon_g$ (eV) |
|--------------------------------------------------|-------------------------------------------------|--------------------|----------------------------|---------------------------------|
| Sr <sub>2</sub> FeO <sub>3</sub> F               | <i>P4/nmm</i>                                   | 19293              | -2.96                      | 1.20                            |
| Sr <sub>2</sub> PbO <sub>4</sub>                 | <i>Pbam</i>                                     | 20944              | -2.48                      | 1.40                            |
| Sr <sub>2</sub> SnSe <sub>3</sub> F <sub>2</sub> | <i>Pnma</i>                                     | 17057              | -2.23                      | 1.45                            |
| Sr <sub>4</sub> Mn <sub>3</sub> O <sub>10</sub>  | <i>P222<sub>1</sub></i>                         | 18998              | -2.60                      | 1.30                            |
| Sr <sub>6</sub> Sb <sub>6</sub> S <sub>17</sub>  | <i>P2<sub>1</sub>2<sub>1</sub>2<sub>1</sub></i> | 16061              | -1.43                      | 1.74                            |
| SrCu <sub>2</sub> O <sub>2</sub>                 | <i>I4<sub>1</sub>/amd</i>                       | 13900              | -1.67                      | 1.81                            |
| SrCuSeF                                          | <i>P4/nmm</i>                                   | 21228              | -2.15                      | 1.20                            |
| SrCuSF                                           | <i>P4/nmm</i>                                   | 12444              | -2.35                      | 1.51                            |
| SrIn <sub>2</sub> O <sub>4</sub>                 | <i>Pnma</i>                                     | 540688             | -2.37                      | 1.81                            |
| Te <sub>2</sub> Mo                               | <i>P6<sub>3</sub>/mmc</i>                       | 602                | -0.27                      | 0.97                            |
| TiPbO <sub>3</sub>                               | <i>P4mm</i>                                     | 20459              | -2.74                      | 1.82                            |
| V <sub>5</sub> Pb <sub>2</sub> O <sub>12</sub>   | <i>P2/c</i>                                     | 22296              | -2.29                      | 1.82                            |
| VCu <sub>3</sub> Se <sub>4</sub>                 | <i>P<math>\bar{4}</math>3m</i>                  | 21855              | -0.49                      | 0.82                            |
| VO                                               | <i>Fm<math>\bar{3}</math>m</i>                  | 19184              | -2.09                      | 0.78                            |
| WS <sub>2</sub>                                  | <i>P6<sub>3</sub>/mmc</i>                       | 224                | -1.26                      | 1.56                            |
| WSe <sub>2</sub>                                 | <i>P6<sub>3</sub>/mmc</i>                       | 1821               | -0.56                      | 1.45                            |
| YCuS <sub>2</sub>                                | <i>Pnma</i>                                     | 10533              | -1.70                      | 1.60                            |
| ZnCo <sub>2</sub> O <sub>4</sub>                 | <i>Fd<math>\bar{3}</math>m</i>                  | 753489             | -1.49                      | 1.94                            |
| ZnFe <sub>2</sub> O <sub>4</sub>                 | <i>Fd<math>\bar{3}</math>m</i>                  | 19313              | -1.89                      | 1.67                            |
| ZnGeP <sub>2</sub>                               | <i>I<math>\bar{4}</math>2d</i>                  | 4524               | -0.21                      | 1.17                            |
| ZnP <sub>2</sub>                                 | <i>P4<sub>3</sub>2<sub>1</sub>2</i>             | 11025              | -0.25                      | 1.46                            |
| ZnSe                                             | <i>F<math>\bar{4}</math>3m</i>                  | 1190               | -0.72                      | 1.17                            |
| ZnTe                                             | <i>F<math>\bar{4}</math>3m</i>                  | 2176               | -0.47                      | 1.08                            |

#### S4. Tauc measurements of band gaps

The band gaps of the synthesized compounds were determined using diffuse reflectance with a UV-visible spectrophotometer, as described in the Materials Characterization section in the main text. The results of the Tauc measurements are summarized in Fig. S2. Most of the samples showed a clear transition in the Tauc plot; however, multiple transitions were found for some of the compounds, most notably for  $\text{BaCaFe}_4\text{O}_6$ , which indicates the presence of mid-gap states, potentially due to defects.

#### S5. Mott–Schottky measurements of band edges

To determine the band edges of the synthesized materials, Mott–Schottky measurements were performed in an aqueous solution with a sodium phosphate buffer electrolyte at pH 8, and with the room's lights turned off. The measurements were performed for different frequencies over a range of potentials at constant frequency. The flatband potentials were averaged across these different frequencies to obtain the values reported in Table 1 of the main text. The Mott–Schottky plots of the compounds are shown in Fig. S3.

#### S6. Gas chromatography measurements

Hydrogen evolution tests were carried out using a gas chromatography setup depicted below:

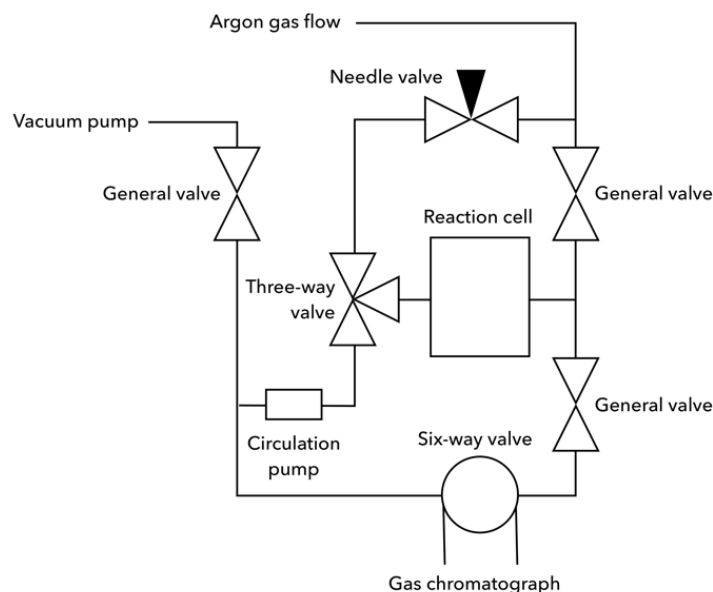

Measurements were performed using a HP 5890 Series II gas chromatograph with a thermal conductivity detector under argon carrier gas. The setup can operate in continuous-flow and accumulation-flow modes. Under continuous flow, the argon supply was controlled by a needle valve and the generated gas was tested continuously by the gas chromatograph. In accumulation mode, the produced gas was stored for a period of time before being transferred to the gas chromatograph by the circulation pump. In this work, hydrogen evolution data were collected in the accumulation mode. The results of the gas chromatography are plotted in Fig. S5. The gas chromatograph was calibrated *via* needle injection of a known volume of gas.



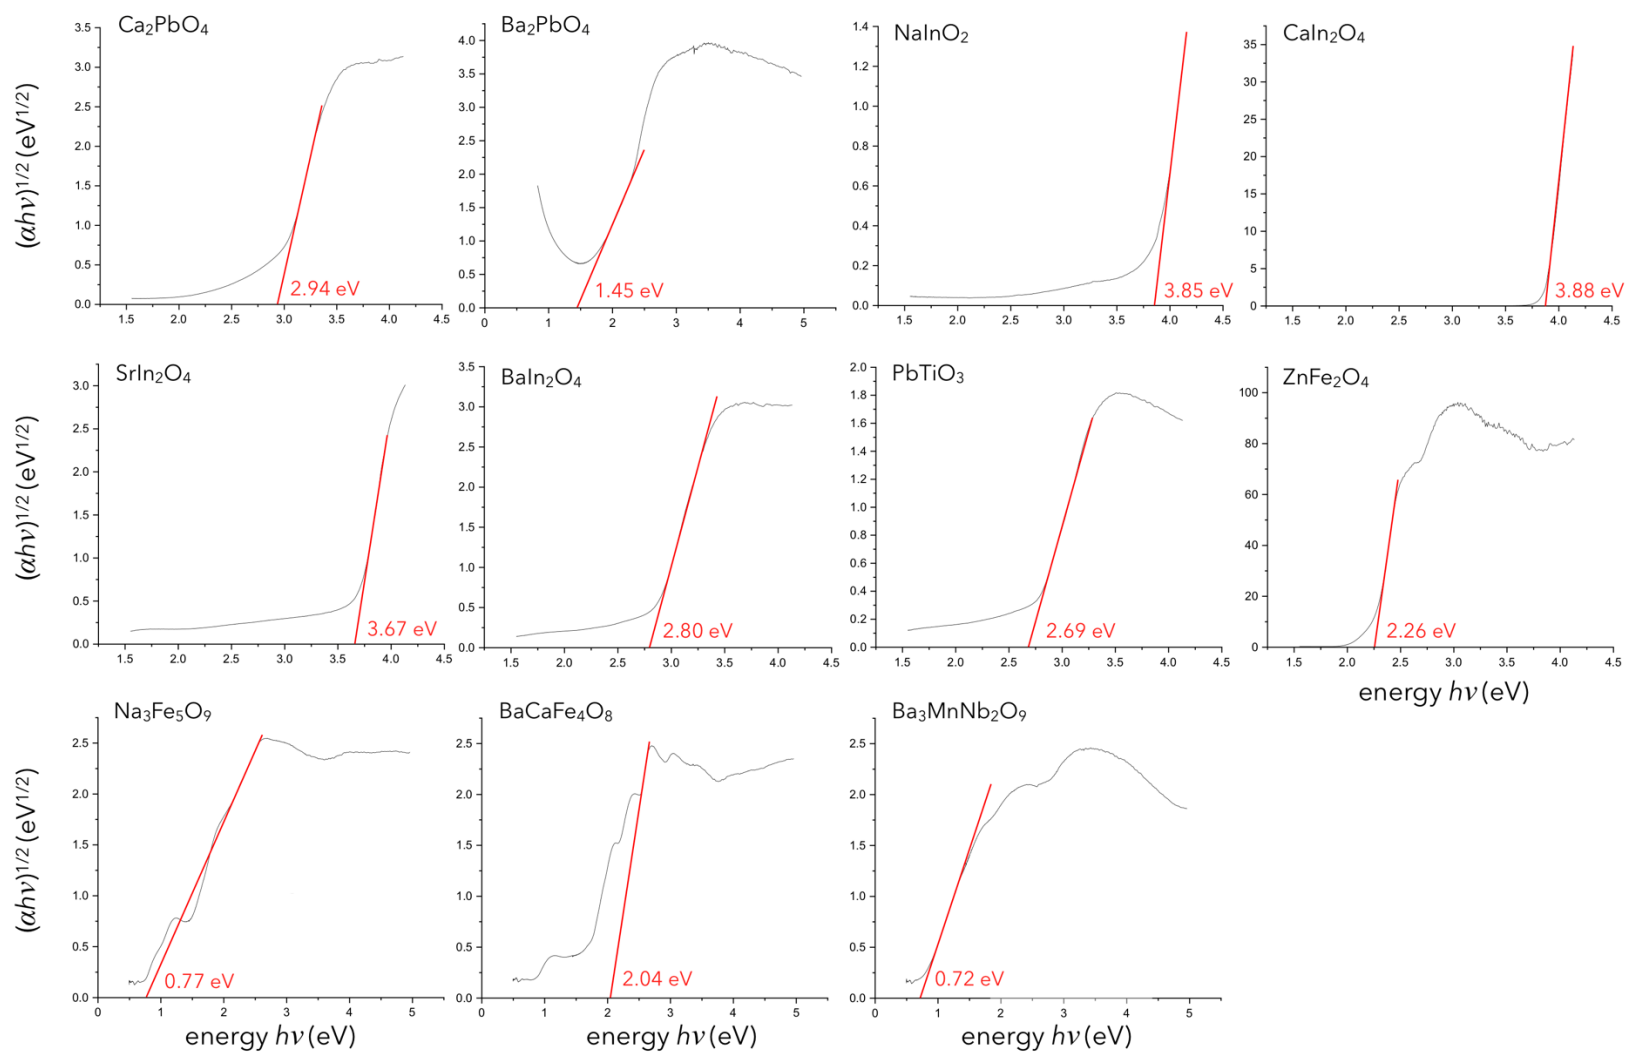

**Figure S4** Tauc plots of the synthesized compounds. The band gaps of the materials were determined by linear extrapolation of the Tauc signal. The light absorption coefficient and energy of the incident photon are denoted as  $\alpha$  and  $h\nu$ , respectively.

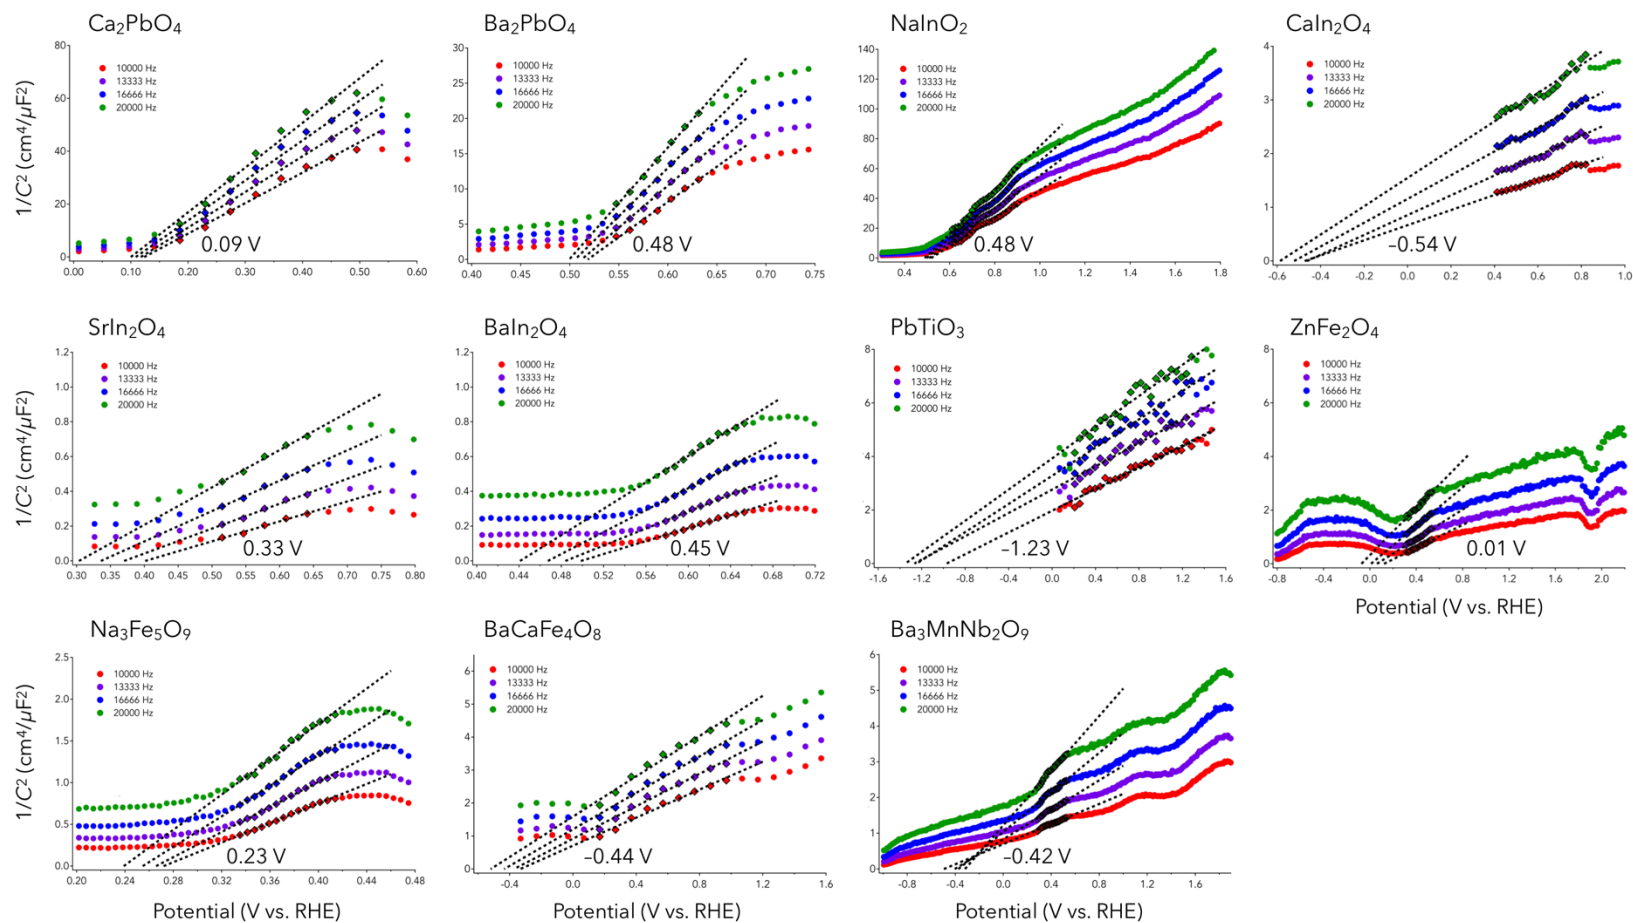

**Figure S5** Mott–Schottky analysis of the synthesized compounds. The measurements were performed in an aqueous sodium phosphate buffer solution at pH 8, and under dark conditions. Following the Mott–Schottky equation, the flatband potentials  $E_{FB}$  were determined as  $E_0 - k_B T/e = E_0 - 0.025$  V where  $E_0$  denotes the intercept of the linearly extrapolated inverse squared capacitance with the horizontal axis, averaged over frequencies.

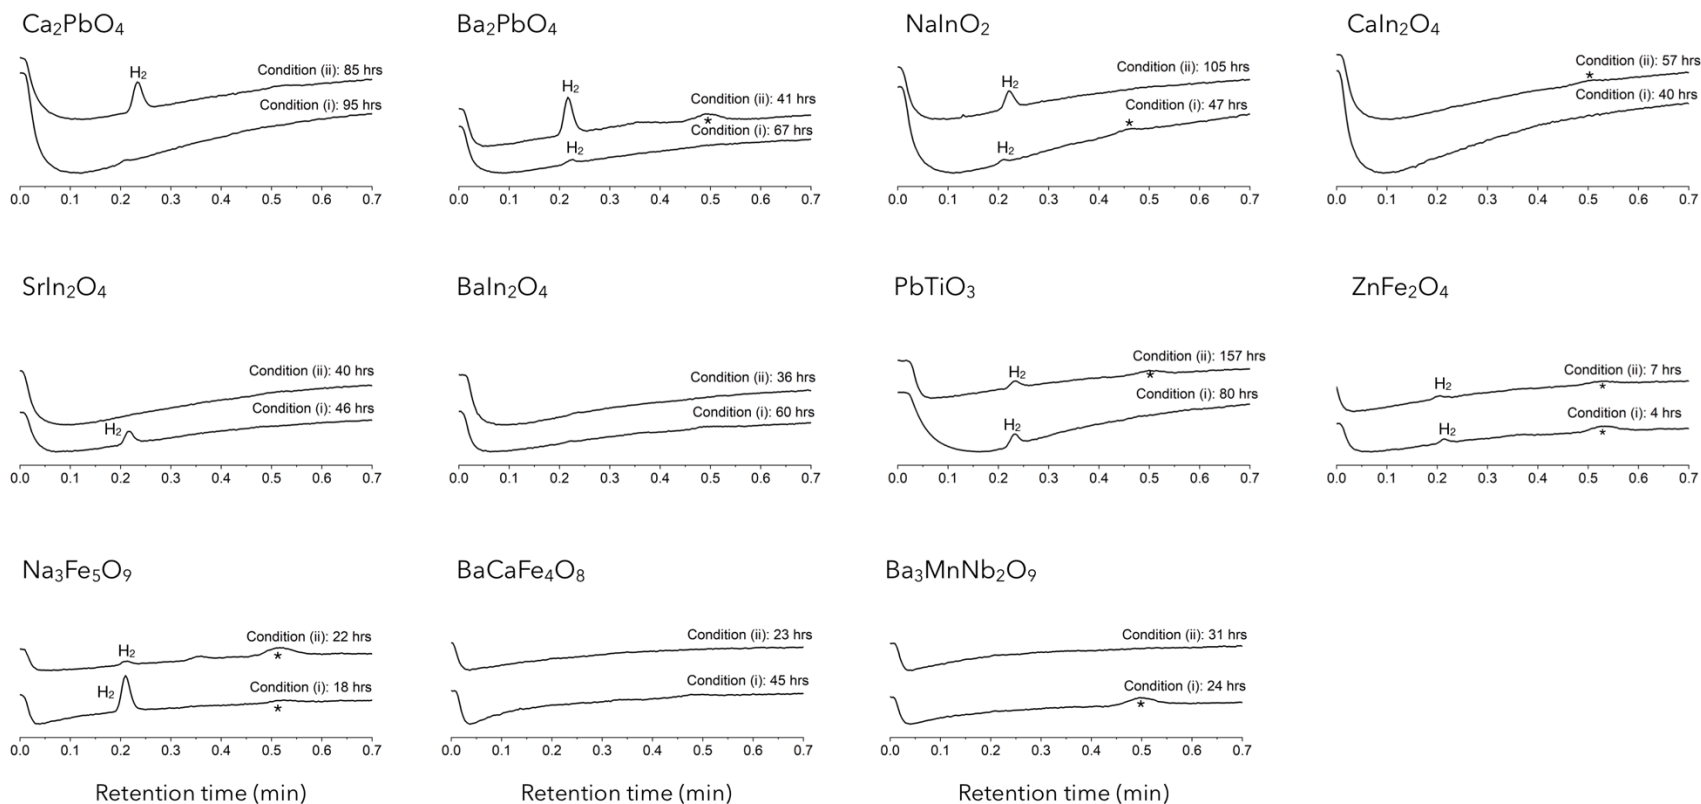

**Figure S6** Gas chromatography measurements of the synthesized compounds for water-splitting applications. Measurements were performed under condition (i) with 0.1 M oxalic acid solution and under condition (ii) with a volume fraction of 15% of methanol in water, as described in the main text. The retention times are given in fraction of a minute (0.1 minute means 6 seconds). The moderate drifts in the hydrogen baseline are due to slight fluctuations in the pressure of argon in the instrument. The asterisks (\*) indicate nitrogen that possibly originates from traces of air remaining in the chamber but was not found to affect hydrogen detection.

## S7. Synthesizability

**Table S3** Evidence of synthesizability for the 162 candidate compounds, including an illustration of the crystal structure, a synopsis of the synthesis method, and the corresponding literature reference. The elements in the chemical formula are ordered by increasing electronegativity.

|                                                  | Crystal structure                                                                   | Synopsis                                                                                                                                  | Reference |
|--------------------------------------------------|-------------------------------------------------------------------------------------|-------------------------------------------------------------------------------------------------------------------------------------------|-----------|
| $\text{AlCuO}_2$                                 | 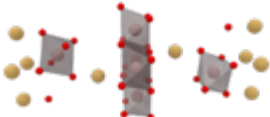   | $\text{Cu}_2\text{O} + \text{Al}_2\text{O}_3 + \text{PbO}$ at 900 °C for 48-96 hours                                                      | Ref. 1    |
| $\text{BaCu}_2\text{O}_2$                        |    | $\text{BaCuO}_2$ ( $\text{BaCO}_3 + \text{CuO}$ ) + Cu at 1023 K for 2 days                                                               | Ref. 2    |
| $\text{Ba}_2\text{Fe}_2\text{O}_5$               |    | $\text{BaCO}_3 + \alpha\text{-Fe}_2\text{O}_3$ at 1373 K for 24 hours under nitrogen                                                      | Ref. 3    |
| $\text{Ba}_2\text{In}_2\text{S}_5$               |    | Ba + In + S at 1150-1250 °C in sealed ampoule                                                                                             | Ref. 4    |
| $\text{Ba}_2\text{PbO}_4$                        |  | $\text{BaCO}_3 + \text{PbO}_2$ at 450 °C for 12 hours, then 950 °C for 12 hours in sealed ampoule, sintered in air for 24 hours at 950 °C | Ref. 5    |
| $\text{Ba}_2\text{SnSe}_3\text{F}_2$             |  | $\text{BaF}_2 + \text{BaS} + \text{SnSe} + \text{Se}$ in sealed ampoule at 700 °C for 12 hours                                            | Ref. 6    |
| $\text{Ba}_3\text{MnNb}_2\text{O}_9$             |  | $\text{BaCO}_3 + \text{MnO}_2 + \text{Nb}_2\text{O}_5$ at 850 °C for 20 hours, then 1350 °C for 5 days                                    | Ref. 7    |
| $\text{Ba}_3\text{Zn}_5\text{In}_2\text{O}_{11}$ |  | $\text{BaO} + \text{ZnO} + \text{In}_2\text{O}_3$ in $\text{HNO}_3 + \text{KO}_2$ at 750 °C for 12 days                                   | Ref. 8    |
| $\text{Ba}_6\text{Mn}_5\text{O}_{16}$            |  | $\text{BaCO}_3 + \text{MnO}_2$ in air at 1250 °C for 3 days and quenched                                                                  | Ref. 9    |

|                                                | Crystal structure                                                                   | Synopsis                                                                                                                                                                                                   | Reference |
|------------------------------------------------|-------------------------------------------------------------------------------------|------------------------------------------------------------------------------------------------------------------------------------------------------------------------------------------------------------|-----------|
| $\text{Ba}_6\text{V}_4\text{S}_{11}\text{O}_5$ | 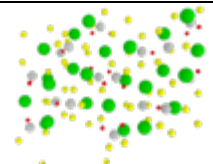   | $\text{BaS} + \text{V} + \text{V}_2\text{O}_5 + \text{S}$ in sealed ampoule at 1198 K for 4 days                                                                                                           | Ref. 10   |
| $\text{Ba}_8\text{Sb}_6\text{S}_{17}$          |    | $\text{BaS} + \text{Sb}_2\text{O}_3$ at 1120 K                                                                                                                                                             | Ref. 11   |
| $\text{BaAlSi}_5\text{N}_7\text{O}_2$          |    | $\text{Ba} + \text{Si}_3\text{N}_4 + \text{AlN}$ heated to 1600 °C for 8 hours                                                                                                                             | Ref. 12   |
| $\text{BaCaFe}_4\text{O}_8$                    |    | $\text{BaNO}_3 + \text{CaCO}_3 + \text{FeO}$ in air at 1100 °C                                                                                                                                             | Ref. 13   |
| $\text{BaHfN}_2$                               |   | $\text{Ba}_3\text{N}_2$ (Ba in molten Na at 250 °C, heated to 520 °C under $\text{N}_2$ , then 350 °C for 24 hours under vacuum) + $\text{HfN}_2$ in Mo foil welded, heated to 1000 °C for 5 days under Ar | Ref. 14   |
| $\text{BaIn}_2\text{O}_4$                      |  | $\text{BaCO}_3 + \text{In}_2\text{O}_3$ at 840 °C for 12 hours                                                                                                                                             | Ref. 15   |
| $\text{BaS}_2$                                 |  | $\text{BaS} + \text{S}$ in sealed ampoule at 800 °C                                                                                                                                                        | Ref. 16   |
| $\text{BaSbSe}_2\text{F}$                      |  | $\text{BaF}_2 + \text{Ba} + \text{Sb}_2\text{Se}_3 + \text{Se}$ at 700 °C in sealed ampoule                                                                                                                | Ref. 17   |
| $\text{BaSnS}_2$                               |  | $\text{BaS} + \text{SnS}$ at 750 °C for 2 weeks                                                                                                                                                            | Ref. 18   |
| $\text{Ca}_{12}\text{Al}_{14}\text{O}_{33}$    |  | $\text{CaO} + \text{Al}_2\text{O}_3$ at 453 K for 1 weeks, 1623 K for 24 hours, then 1623 K for 48 hours                                                                                                   | Ref. 19   |

|                                           | Crystal structure                                                                   | Synopsis                                                                                                                  | Reference |
|-------------------------------------------|-------------------------------------------------------------------------------------|---------------------------------------------------------------------------------------------------------------------------|-----------|
| $\text{Ca}_2\text{CoO}_3$                 | 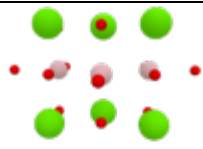   | $\text{CaCO}_3 + \text{Co}_3\text{O}_4$ ball-milled in IPA and calcined at 900 °C for 17 days                             | Ref. 20   |
| $\text{Ca}_2\text{FeClO}_3$               |    | $\text{CaCl}_2 + \text{Fe}_2\text{O}_3$ in $\text{CaCl}_2$ flux at 850 °C for 5 hours in Pt crucible                      | Ref. 21   |
| $\text{Ca}_2\text{PbO}_4$                 |    | $\text{CaCO}_3$ and $\text{PbO}$ in 2:1 ratio at 800 °C for 72 hours                                                      | Ref. 22   |
| $\text{Ca}_3\text{PCl}_3$                 |    | $\text{Ca}_3\text{P}_2 + \text{CaCl}_2$ in steel ampoules under Ar at 740 °C then 950 °C                                  | Ref. 23   |
| $\text{CaFeClO}_2$                        |   | $\text{CaCl}_2 + \text{Fe}_2\text{O}_3$ at 800 °C for 6 hours in Pt crucible                                              | Ref. 21   |
| $\text{CaIn}_2\text{O}_4$                 |  | $\text{In}_2\text{O}_3 + \text{CaO}$ at 1400 °C for 24 hours                                                              | Ref. 24   |
| $\text{CaSb}_{10}\text{S}_6\text{O}_{10}$ |  | $\text{CaO} + \text{SrCO}_3 + \text{Sb}_2\text{S}_3 + \text{Sb}_2\text{O}_3$ at 100-650 °C hydrothermally                 | Ref. 25   |
| $\text{CaTaNO}_2$                         |  | $\text{CaCO}_3 + \text{Ta}_2\text{O}_5$ at 900 °C in ammonia                                                              | Ref. 26   |
| $\text{CoPb}_2\text{WO}_6$                |  | $\text{PbO} + \text{WO}_3 + \text{CoO}$ in sealed ampoule at 1050 K for 12 hours                                          | Ref. 27   |
| $\text{Cr}_3\text{BO}_6$                  |  | $\text{Cr}_2(\text{SO}_4)_3 \cdot 6\text{H}_2\text{O} + \text{H}_3\text{BO}_3$ ball-milled and fired at 680 °C for 3 days | Ref. 28   |

|                                        | Crystal structure                                                                   | Synopsis                                                                                                                                         | Reference |
|----------------------------------------|-------------------------------------------------------------------------------------|--------------------------------------------------------------------------------------------------------------------------------------------------|-----------|
| $\text{CrPb}_5\text{O}_8$              | 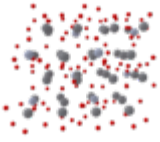   | $\text{PbO} + \text{Pb}_2\text{O}(\text{CrO}_4)$ ( $\text{CrO}_3 + \text{PbO} + \text{NaOH}$ hydrothermally at 120 °C for 18 h) in air at 900 °C | Ref. 29   |
| $\text{Cs}_4\text{Ta}_2\text{S}_{11}$  |    | $\text{Cs}_2\text{S}_3$ ( $\text{Cs} + \text{S}$ in liquid $\text{NH}_3$ ) + $\text{Ta} + \text{S}$ in sealed ampoule at 773 K for 2 days        | Ref. 30   |
| $\text{Cs}_4\text{Ti}_3\text{S}_{14}$  |    | $\text{Ti} + \text{S} + \text{Cs}_2\text{S}_3$ flux ( $\text{Cs} + \text{S}$ in $\text{NH}_3$ ) heated to 873 K for 4 days                       | Ref. 31   |
| $\text{Cs}_4\text{Zr}_3\text{Se}_{14}$ |    | $\text{Zr} + \text{Se} + \text{Cs}_2\text{Se}_3$ ( $\text{Cs} + \text{Se}$ in liquid $\text{NH}_3$ )                                             | Ref. 31   |
| $\text{CsCuO}_2$                       |   | $\text{CsO}_2 + \text{CuO}$ under flowing oxygen at 400 °C for 6 days                                                                            | Ref. 32   |
| $\text{CsGeI}_3$                       |  | $\text{HI} + \text{H}_3\text{PO}_2 + \text{GeI}_4 + \text{CsI}$ (colloidal)                                                                      | Ref. 33   |
| $\text{CsLaNb}_2\text{O}_7$            |  | $\text{Cs}_2\text{CO}_3 + \text{La}_2\text{O}_3 + \text{Nb}_2\text{O}_5$ in 4:1:2 ratio at 1273 K in air                                         | Ref. 34   |
| $\text{CsMnBr}_3$                      |  | Can be synthesized colloiddally or via thin film fabrication                                                                                     | Ref. 35   |
| $\text{CsMnI}_3$                       |  | $\text{MnI}_2$ (prepared from the elements and purified by sublimation) + $\text{CsI}$ at 380 °C for 7 days in sealed ampoule                    | Ref. 36   |
| $\text{CsSbS}_2$                       |  | Hydrothermal synthesis of $\text{Cs}_2\text{S}$ and $\text{Sb}_2\text{S}_3$                                                                      | Ref. 37   |

|                                       | Crystal structure                                                                   | Synopsis                                                                                                                                             | Reference |
|---------------------------------------|-------------------------------------------------------------------------------------|------------------------------------------------------------------------------------------------------------------------------------------------------|-----------|
| $\text{Cu}_2\text{WS}_4$              | 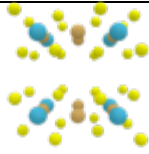   | Can be synthesized colloiddally                                                                                                                      | Ref. 38   |
| $\text{Cu}_3\text{SbS}_3$             |    | $\text{Cu}_2\text{S} + \text{Sb}_2\text{S}_3$ at 853 K in sealed quartz tube                                                                         | Ref. 39   |
| $\text{Cu}_4\text{Mo}_5\text{O}_{17}$ |    | $\text{Cu}_2\text{O} + \text{MoO}_3$ in sealed ampoule                                                                                               | Ref. 40   |
| $\text{CuI}$                          |    | Can be purchased                                                                                                                                     | Ref. 41   |
| $\text{CuP}_2$                        |   | Copper halide + red P + hexadecane via Schlenk technique                                                                                             | Ref. 42   |
| $\text{Fe}_3\text{BO}_6$              |  | $\text{Na}_3\text{BO}_3 + \text{Fe}_2\text{O}_3$ at 200 °C, then 1200 °C in air for 18 hours then heated in boiling water then treated with HCl      | Ref. 43   |
| $\text{FeNi}_2\text{BO}_5$            |  | $\text{NiO} + \text{Fe}_2\text{O}_3 + \text{B}_2\text{O}_3$ at 1100 °C for 4 hours                                                                   | Ref. 44   |
| $\text{Ga}_2\text{TeSe}_2$            |  | $\text{Ga}_2\text{Se}_3 + \text{Ga}_2\text{Te}_3$ at 800 K for 1 year                                                                                | Ref. 45   |
| $\text{GaCu}_4$                       |  | $\text{CuI} + \text{GaI}_3$ in sealed ampoule at 573 K (slow cooling to room temp at 1 K/hour)                                                       | Ref. 46   |
| $\text{GaCuO}_2$                      |  | $\text{Na}_2\text{CO}_3 + \text{Ga}_2\text{O}_3$ at 900 °C for 20 hours, then mixed with $\text{CuCl}$ and fired at 250 °C for 48 hours under vacuum | Ref. 47   |



|                                                | Crystal structure                                                                   | Synopsis                                                        | Reference |
|------------------------------------------------|-------------------------------------------------------------------------------------|-----------------------------------------------------------------|-----------|
| GaN                                            | 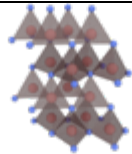   | Can be made via thin film fabrication                           | Ref. 48   |
| GaS                                            |    | Can be synthesized colloiddally or via thin film fabrication    | Ref. 49   |
| Ge <sub>4</sub> Se <sub>9</sub>                |    | Ta + Ge + Se + RbCl in sealed ampoule at 1073 K for 96 h        | Ref. 50   |
| GeS                                            |    | Can be made via thin film fabrication                           | Ref. 51   |
| GeSe                                           |   | Can be synthesized colloiddally                                 | Ref. 49   |
| GeSe <sub>2</sub>                              |  | Ge + Se at 1173 K for 48 hours in sealed quartz tube            | Ref. 52   |
| GeTe                                           |  | Ge + Te in sealed ampoule at 1000 °C for 24 hours               | Ref. 53   |
| In <sub>2</sub> O <sub>3</sub>                 |  | Can be purchased                                                | Ref. 54   |
| In <sub>4</sub> Bi <sub>2</sub> S <sub>9</sub> |  | Bi + In + S + I via CVT with temperature gradient of 680-600 °C | Ref. 55   |
| InBr                                           |  | In + InBr <sub>3</sub>                                          | Ref. 49   |

|                                                 | Crystal structure                                                                   | Synopsis                                                                                                                                                                                              | Reference |
|-------------------------------------------------|-------------------------------------------------------------------------------------|-------------------------------------------------------------------------------------------------------------------------------------------------------------------------------------------------------|-----------|
| InI                                             |    | In + I via sublimation with 200 °C to 100 °C gradient                                                                                                                                                 | Ref. 49   |
| InSb <sub>2</sub> S <sub>4</sub> Br             |    | In + SbBr <sub>3</sub> + Sb + S at 450 °C in sealed ampoule                                                                                                                                           | Ref. 56   |
| InSb <sub>2</sub> S <sub>4</sub> Cl             |    | In + SbCl <sub>3</sub> + Sb + S at 450 °C in sealed ampoule                                                                                                                                           | Ref. 56   |
| InSb <sub>2</sub> Se <sub>4</sub> Br            |    | In + SbBr <sub>3</sub> + Sb + Se in sealed quartz ampoule                                                                                                                                             | Ref. 56   |
| K <sub>2</sub> CoCl <sub>4</sub>                |   | KCl + CoCl <sub>2</sub> melted, annealed in sealed quartz tube at 400 °C for 1 week (phase change after several months)                                                                               | Ref. 57   |
| K <sub>2</sub> NbCuS <sub>4</sub>               |  | K <sub>2</sub> S <sub>3</sub> + Cu + Nb + S at 623 K for 6 days                                                                                                                                       | Ref. 58   |
| K <sub>2</sub> TaCuSe <sub>4</sub>              |  | K <sub>2</sub> Se <sub>5</sub> + Ta + Cu + Se in sealed ampoule at 950 °C                                                                                                                             | Ref. 59   |
| K <sub>3</sub> LaP <sub>2</sub> Se <sub>8</sub> |  | Se + K <sub>2</sub> Se <sub>4</sub> + P + La in sealed ampoule at 725 °C for 150 hours                                                                                                                | Ref. 60   |
| K <sub>3</sub> P <sub>11</sub>                  |  | K + P in sealed ampoule at 380 °C for 12 h, 470 °C for 86 hours                                                                                                                                       | Ref. 61   |
| K <sub>3</sub> PSe <sub>16</sub>                |  | K <sub>2</sub> Se <sub>3</sub> (K + Se in liquid NH <sub>3</sub> ) + P <sub>2</sub> Se <sub>5</sub> (P + Se in ampoule at 450 °C for 24 hours) + Se + 1 mL acetonitrile heated to 110 °C for 24 hours | Ref. 62   |

|                   | Crystal structure                                                                   | Synopsis                                                                                         | Reference |
|-------------------|-------------------------------------------------------------------------------------|--------------------------------------------------------------------------------------------------|-----------|
| $K_3PSe_4$        | 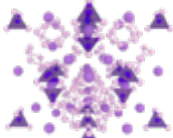   | P + Se + $K_2Se_2$ in sealed ampoule at 500 °C for 150 hours                                     | Ref. 63   |
| $K_3VP_2O_8$      |    | $K_2CO_3$ + $H(NH_4)_2PO_4$ + $V_2O_5$ at 673 K in air + V in sealed ampoule at 972 K for 1 week | Ref. 64   |
| $K_4P_{21}I$      |    | K + P + I in sealed ampoule at 373 K for 3 days                                                  | Ref. 65   |
| $KBiP_2Se_6$      |    | $K_2Se$ + Bi + $P_2Se_5$ + Se in sealed quartz tube at 200 °C                                    | Ref. 66   |
| $KCoO_2$          |   | $K_2CO_3$ + $Co_3O_4$ at 1133-1203 K in air                                                      | Ref. 67   |
| $KCuO_2$          |  | $KO_2$ + CuO under flowing oxygen at 400 °C for 6 days                                           | Ref. 32   |
| $KLa_5C_2Cl_{10}$ |  | $LaCl_3$ + K + La + C in sealed Nb ampoule at 700-900 °C                                         | Ref. 68   |
| $KNaZnO_2$        |  | $Na_2ZnO_2$ + $K_2ZnO_2$ in sealed Ag cylinder under Ar at 500-600 °C for 7-14 days              | Ref. 69   |
| $La_{10}Se_{14}O$ |  | La + Se + $SeO_2$ + CsCl in sealed ampoule at 800 °C for 4 days                                  | Ref. 70   |
| $La_4Mo_2O_{11}$  |  | $La_2O_3$ + $MoO_3$ + Mo in sealed Mo crucible at 1980 K for 48 hours                            | Ref. 71   |

|                                                | Crystal structure                                                                   | Synopsis                                                                                                                                  | Reference |
|------------------------------------------------|-------------------------------------------------------------------------------------|-------------------------------------------------------------------------------------------------------------------------------------------|-----------|
| $\text{La}_4\text{Se}_3\text{O}_4$             | 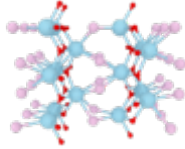   | La + Se + $\text{SeO}_2$ in sealed quartz tube heated to 750 °C for 168 hours                                                             | Ref. 72   |
| $\text{La}_6\text{BN}_3\text{O}_6$             |    | $\text{Li}_3\text{BN}_2$ + $\text{Li}_3\text{N}$ + $\text{LaOCl}$ at 950 °C                                                               | Ref. 73   |
| $\text{LaCuS}_2$                               |    | $\text{La}_2\text{Cu}_2\text{O}_5$ ( $\text{La}_2\text{O}_3$ + $\text{Cu}_2\text{O}$ ) + S                                                | Ref. 74   |
| $\text{LaCuSeO}$                               |    | $\text{La}_2\text{O}_3$ + $\text{La}_2\text{Se}_3$ (La + Se at 300 °C) + Cu + Se at 800 °C                                                | Ref. 75   |
| $\text{LaCuSO}$                                |   | $\text{La}_2\text{O}_3$ + $\text{La}_2\text{S}_3$ + $\text{Cu}_2\text{S}$ at 800 °C                                                       | Ref. 75   |
| $\text{LaSO}$                                  |  | S + $\text{K}_2\text{S}$ + $\text{La}_2\text{O}_3$ at 923 K under Ar                                                                      | Ref. 76   |
| $\text{LaTiNO}_2$                              |  | $\text{La}_2\text{O}_3$ + $\text{TiO}_2$ in air at 1050 °C for 24 hours, 1310 °C in air for 24 hours, ammonia flow at 950 °C for 20 hours | Ref. 77   |
| $\text{Li}_2\text{MnBr}_4$                     |  | $\text{LiBr}$ + $\text{MnBr}_2$ in sealed quartz ampoule at 1100 °C                                                                       | Ref. 78   |
| $\text{Li}_3\text{V}_2\text{P}_3\text{O}_{12}$ |  | $\text{V}_2\text{O}_5$ + $\text{LiOH}\cdot\text{H}_2\text{O}$ + $\text{NH}_4\text{H}_2\text{PO}_4$ + C at 800 °C for 24 h                 | Ref. 79   |
| $\text{LiCoO}_2$                               |  | $\text{CoO}$ + $\text{Li}_2\text{CO}_3$                                                                                                   | Ref. 80   |

|                                               | Crystal structure                                                                   | Synopsis                                                                                                                           | Reference |
|-----------------------------------------------|-------------------------------------------------------------------------------------|------------------------------------------------------------------------------------------------------------------------------------|-----------|
| LiCuO                                         | 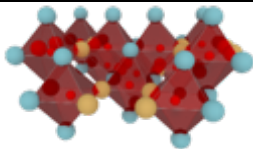   | Li <sub>2</sub> O + Cu <sub>2</sub> O at 1073 K for 6 hours in sealed quartz ampoule                                               | Ref. 81   |
| LiVO <sub>2</sub>                             |    | Li <sub>2</sub> CO <sub>3</sub> + V <sub>2</sub> O <sub>5</sub> under Ar/H <sub>2</sub> at 625 °C for 14 hours, 750 °C for 4 hours | Ref. 82   |
| MgFe <sub>2</sub> O <sub>4</sub>              |    | MgO + Fe <sub>2</sub> O <sub>3</sub> in air at 900 °C                                                                              | Ref. 83   |
| MgB <sub>9</sub> N                            |    | Mg + B in a BN crucible in a W container at 1873 K under Ar for 1 hours, then under vacuum for 15 minutes at 1023 K                | Ref. 84   |
| MgMoN <sub>2</sub>                            |   | NaN <sub>3</sub> + Mo + Mg in autoclave at 700 °C for 10 hours                                                                     | Ref. 85   |
| MgTe <sub>2</sub>                             |  | Mg + Te in sealed ampoule at 670 K for 15 hours, 770 K for 15 hours                                                                | Ref. 86   |
| MnGa <sub>2</sub> S <sub>4</sub>              |  | Mn + Ga + S in sealed ampoule at 600 °C for 2 days, 900 °C for 2 days and quenched                                                 | Ref. 87   |
| Mn <sub>3</sub> V <sub>2</sub> O <sub>8</sub> |  | MnO + V <sub>2</sub> O <sub>5</sub> + MoO <sub>3</sub> in Pt crucible at 1110 °C for 1 hours                                       | Ref. 88   |
| MnO                                           |  | Can be purchased                                                                                                                   | Ref. 89   |
| Mo <sub>6</sub> PbI <sub>14</sub>             |  | PbI <sub>2</sub> + MoI <sub>2</sub> at 600 °C for 1 week                                                                           | Ref. 90   |

|                                                                 | Crystal structure                                                                   | Synopsis                                                                                                                                                                                  | Reference |
|-----------------------------------------------------------------|-------------------------------------------------------------------------------------|-------------------------------------------------------------------------------------------------------------------------------------------------------------------------------------------|-----------|
| MoS <sub>2</sub>                                                |    | Can be synthesized colloiddally                                                                                                                                                           | Ref. 91   |
| MoSe <sub>2</sub>                                               |    | Can be synthesized colloiddally                                                                                                                                                           | Ref. 92   |
| Na <sub>2</sub> Sn <sub>2</sub> Se <sub>5</sub>                 |    | Na <sub>2</sub> Se + Sn + Se at 450 °C in sealed quartz ampoule                                                                                                                           | Ref. 93   |
| Na <sub>2</sub> TeO <sub>4</sub>                                |    | NaOH + Te(OH) <sub>6</sub> in hydrothermal furnace at 580 °C                                                                                                                              | Ref. 94   |
| Na <sub>3</sub> BiO <sub>4</sub>                                |   | Na <sub>2</sub> O <sub>2</sub> + Bi <sub>2</sub> O <sub>3</sub> at 600 °C for 12 hours (or 700 °C for 30h)                                                                                | Ref. 95   |
| Na <sub>3</sub> Fe <sub>5</sub> O <sub>9</sub>                  |  | Na <sub>2</sub> CO <sub>3</sub> + Fe <sub>2</sub> O <sub>3</sub> at 1100 °C                                                                                                               | Ref. 96   |
| Na <sub>3</sub> Mn <sub>4</sub> Te <sub>2</sub> O <sub>12</sub> |  | MnO <sub>2</sub> + Te(OH) <sub>6</sub> in 1 M NaOH in autoclave at 648 K for 5 days                                                                                                       | Ref. 97   |
| Na <sub>3</sub> WN <sub>3</sub>                                 |  | W <sub>2</sub> N (WO <sub>3</sub> + NH <sub>3</sub> at 700 °C for 11 hours) + Na under NH <sub>3</sub> flow at 350 °C, then 500 °C for 8 hours, then 600 °C for 8 then 500 °C for 8 hours | Ref. 98   |
| Na <sub>4</sub> Fe <sub>2</sub> O <sub>5</sub>                  |  | Na <sub>2</sub> O <sub>2</sub> + Fe <sub>2</sub> O <sub>3</sub> at 600 °C for 6 days                                                                                                      | Ref. 99   |
| Na <sub>4</sub> VP <sub>2</sub> O <sub>9</sub>                  |  | Na <sub>4</sub> P <sub>2</sub> O <sub>7</sub> + VO <sub>2</sub> in sealed ampoule at 700 °C for 3 days                                                                                    | Ref. 100  |

|                                     | Crystal structure                                                                   | Synopsis                                                                                                                | Reference |
|-------------------------------------|-------------------------------------------------------------------------------------|-------------------------------------------------------------------------------------------------------------------------|-----------|
| $\text{Na}_5\text{CoHO}_4$          | 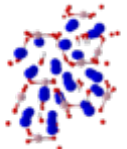   | $\text{Na}_2\text{O} + \text{CdO} + \text{NaOH} + \text{Co}$ under Ar at 600 °C for 21 days                             | Ref. 101  |
| $\text{Na}_5\text{CuH}_2\text{O}_4$ |    | $\text{Na}_2\text{O}$ (Na + NaOH) + NaOH + $\text{Cu}_2\text{O}$ in Ni/Ag container sealed ampoule at 600 °C for 5 days | Ref. 102  |
| $\text{Na}_5\text{NiO}_4$           |    | $\text{Na}_2\text{O} + \text{NaNiO}_2$ at 550 °C for 2 days                                                             | Ref. 103  |
| $\text{NaInO}_2$                    |    | $\text{Na}_2\text{CO}_3 + \text{In}_2\text{O}_3$ at 1100 °C for 48 hours                                                | Ref. 104  |
| $\text{NaMnO}_2$                    |   | $\text{Na}_2\text{CO}_3 + \text{MnO}$                                                                                   | Ref. 105  |
| $\text{NaMo}_6\text{Br}_{13}$       |  | $\text{MoBr}_2 + \text{NaBr}$ in sealed ampoule at 700 °C                                                               | Ref. 106  |
| $\text{NaNbO}_2$                    |  | $\text{Na}_2\text{O} + \text{NbO} + \text{NbO}_2$ at 700 °C for 3 days                                                  | Ref. 107  |
| $\text{Nb}_3\text{Sb}_2\text{Te}_5$ |  | Nb + Sb + Te in sealed quartz ampoule at 600 °C for 2 weeks                                                             | Ref. 108  |
| $\text{NbCu}_3\text{S}_4$           |  | Cu + Nb + S + I via CVT with temperature gradient of 1123-1053 K for 120 hours                                          | Ref. 109  |
| $\text{Pb}_5\text{S}_2\text{I}_6$   |  | Pb + S + I at 600 °C                                                                                                    | Ref. 110  |

|                                                  | Crystal structure                                                                   | Synopsis                                                                                                          | Reference |
|--------------------------------------------------|-------------------------------------------------------------------------------------|-------------------------------------------------------------------------------------------------------------------|-----------|
| PbO                                              |    | Can be purchased                                                                                                  | Ref. 111  |
| Rb <sub>2</sub> MnCl <sub>4</sub>                |    | RbCl + MnCl <sub>2</sub> in sealed ampoule until molten, then cooled slowly                                       | Ref. 112  |
| Rb <sub>2</sub> NaMnO <sub>4</sub>               |    | Na <sub>2</sub> O + Rb <sub>2</sub> O + Mn + CdO in Ag crucibles sealed in ampoule heated to 523 K for 14 days    | Ref. 113  |
| Rb <sub>4</sub> Cu <sub>5</sub> Cl <sub>9</sub>  |    | RbCl + CuCl at 220 °C, then 160 °C for 96 hours                                                                   | Ref. 114  |
| Rb <sub>4</sub> P <sub>21</sub> I                |   | Rb + P + I in sealed ampoule at 373 K for 3 days                                                                  | Ref. 115  |
| Rb <sub>4</sub> Ta <sub>2</sub> S <sub>11</sub>  |  | Rb <sub>2</sub> S <sub>3</sub> (Rb + S in liquid NH <sub>3</sub> ) + Ta + S in sealed ampoule at 773 K for 6 days | Ref. 30   |
| Rb <sub>4</sub> Ti <sub>3</sub> S <sub>14</sub>  |  | Ti + S + Rb <sub>2</sub> S <sub>3</sub> flux (Rb + S in NH <sub>3</sub> ) heated to 873 K for 4 days              | Ref. 31   |
| Rb <sub>4</sub> Zr <sub>3</sub> Se <sub>14</sub> |  | Zr + Se + Rb <sub>2</sub> Se <sub>3</sub> (Rb + Se in liquid ammonia) in sealed ampoule at 873 K for 4 days       | Ref. 31   |
| Rb <sub>6</sub> Ta <sub>4</sub> S <sub>25</sub>  |  | Rb <sub>2</sub> S <sub>3</sub> (Rb + S in liquid ammonia under Ar) + Ta + S in sealed ampoule at 723 K for 5 days | Ref. 116  |
| RbCuO <sub>2</sub>                               |  | RbO <sub>2</sub> + CuO under flowing oxygen at 400 °C for 6 days                                                  | Ref. 32   |



|                                               | Crystal structure                                                                   | Synopsis                                                                                             | Reference |
|-----------------------------------------------|-------------------------------------------------------------------------------------|------------------------------------------------------------------------------------------------------|-----------|
| $\text{Sb}_2\text{S}_3$                       |    | Can be purchased                                                                                     | Ref. 117  |
| $\text{SbPb}_2\text{S}_2\text{I}_3$           |    | $\text{PbS} + \text{Sb}_2\text{S}_3 + \text{I}$ in CVT with sealed quartz tube at 600 °C for 12 days | Ref. 118  |
| $\text{SiP}$                                  |    | $\text{Si} + \text{P} + \text{Sn}$ in 500 °C in sealed ampoule for 36 h, then 1150 °C for 10 hours   | Ref. 119  |
| $\text{SiP}_2$                                |    | $\text{Si} + \text{P}$ in sealed quartz tube at 1200 °C                                              | Ref. 120  |
| $\text{SnS}$                                  |   | Can be synthesized colloiddally                                                                      | Ref. 121  |
| $\text{SnS}_2$                                |  | Can be synthesized colloiddally                                                                      | Ref. 122  |
| $\text{SrCu}_2\text{O}_2$                     |  | $\text{SrO} + \text{Cu}_2\text{O}$ at 800 °C                                                         | Ref. 123  |
| $\text{Sr}_{17}\text{Ta}_{10}\text{S}_{42}$   |  | $\text{SrCO}_3 + \text{Ta}_2\text{O}_5 + \text{S}$ in sealed ampoule at 700 °C for 48 hours          | Ref. 124  |
| $\text{Sr}_2\text{Fe}_2\text{S}_2\text{OF}_2$ |  | $\text{SrF}_2 + \text{SrO} + \text{Fe} + \text{S}$ in sealed ampoule at 800 °C for 12 hours          | Ref. 125  |
| $\text{Sr}_2\text{FeBrO}_3$                   |  | $\text{Fe}_2\text{O}_3 + \text{SrCO}_3 + \text{SrBr}_2$ at 850 °C in air for 4 days                  | Ref. 126  |

|                                       | Crystal structure                                                                   | Synopsis                                                                                                                                               | Reference |
|---------------------------------------|-------------------------------------------------------------------------------------|--------------------------------------------------------------------------------------------------------------------------------------------------------|-----------|
| $\text{Sr}_2\text{FeClO}_3$           |    | $\text{Fe}_2\text{O}_3 + \text{SrCO}_3 + \text{SrCl}_2$ at 850 °C in air for 4 days                                                                    | Ref. 126  |
| $\text{Sr}_2\text{FeO}_3\text{F}$     |    | $\text{SrF}_2 + \text{SrO}_2 + \text{Fe}$ at 3 GPa and 1300 °C                                                                                         | Ref. 127  |
| $\text{Sr}_2\text{PbO}_4$             |    | $\text{PbO} + \text{SrCO}_3$ at 1073 K in air                                                                                                          | Ref. 128  |
| $\text{Sr}_2\text{SnSe}_3\text{F}_2$  |    | $\text{SrF}_2 + \text{SrS} + \text{SnSe} + \text{Se}$ in sealed ampoule at 700 °C for 12 hours                                                         | Ref. 6    |
| $\text{Sr}_4\text{Mn}_3\text{O}_{10}$ |   | $\text{SrO} + \text{Sr}(\text{NO}_3)_2 + \text{Mn}_2\text{O}_3$ in sealed ampoule at 1100 °C for 12 hours                                              | Ref. 129  |
| $\text{Sr}_6\text{Sb}_6\text{S}_{17}$ |  | $\text{Sr} + \text{Sb} + \text{S}$ in sealed ampoule at 800 °C for 5 days                                                                              | Ref. 130  |
| $\text{SrCuSeF}$                      |  | $\text{SrSe}_2 + \text{SrF} + \text{Cu}_2\text{Se}$ in sealed ampoule at 500 °C for 6 hours                                                            | Ref. 131  |
| $\text{SrCuSF}$                       |  | $\text{SrF}_2 + \text{SrS}$ ( $\text{SrSO}_4$ under $\text{H}_2$ at 1100 °C for 15 hours) + $\text{Cu}_2\text{S}$ in sealed ampoule 500 °C for 6 hours | Ref. 131  |
| $\text{SrIn}_2\text{O}_4$             |  | Solid state reaction of $\text{SrO} + \text{In}_2\text{O}_3$ at 1200 °C                                                                                | Ref. 132  |
| $\text{Te}_2\text{Mo}$                |  | Can be synthesized colloiddally                                                                                                                        | Ref. 133  |

|                                                 | Crystal structure                                                                   | Synopsis                                                                                                                                                                                                    | Reference |
|-------------------------------------------------|-------------------------------------------------------------------------------------|-------------------------------------------------------------------------------------------------------------------------------------------------------------------------------------------------------------|-----------|
| TiPbO <sub>3</sub>                              | 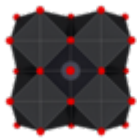   | PbO + TiO <sub>2</sub> at 900 °C                                                                                                                                                                            | Ref. 134  |
| V <sub>5</sub> (PbO <sub>6</sub> ) <sub>2</sub> |    | PbV <sub>2</sub> O <sub>7</sub> (PbO + V <sub>2</sub> O <sub>5</sub> at 600 °C for 5 d in air)<br>+ V <sub>2</sub> O <sub>3</sub> + V <sub>2</sub> O <sub>5</sub> in sealed ampoule at 730 °C<br>for 3 days | Ref. 135  |
| VCu <sub>3</sub> Se <sub>4</sub>                |    | V + Cu + Se in sealed quartz tube at 600 °C<br>for 6 weeks                                                                                                                                                  | Ref. 49   |
| VO                                              |    | V + V <sub>2</sub> O <sub>5</sub> in vacuum at 1000 °C                                                                                                                                                      | Ref. 136  |
| WS <sub>2</sub>                                 |   | Can be made via thin film fabrication                                                                                                                                                                       | Ref. 137  |
| WSe <sub>2</sub>                                |  | Can be synthesized colloiddally                                                                                                                                                                             | Ref. 137  |
| YCuS <sub>2</sub>                               |  | Y + Cu + S in sealed ampoule at 1420 K for<br>4 hours                                                                                                                                                       | Ref. 138  |
| ZnCo <sub>2</sub> O <sub>4</sub>                |  | ZnO + Co <sub>2</sub> O <sub>3</sub>                                                                                                                                                                        | Ref. 49   |
| ZnFe <sub>2</sub> O <sub>4</sub>                |  | ZnO + Fe <sub>2</sub> O <sub>3</sub> at 800 °C, also can be made via<br>flux                                                                                                                                | Ref. 139  |
| ZnGeP <sub>2</sub>                              |  | Zn + Ge + P in Bi flux in sealed ampoule                                                                                                                                                                    | Ref. 140  |

|                  | Crystal structure                                                                 | Synopsis                                                | Reference |
|------------------|-----------------------------------------------------------------------------------|---------------------------------------------------------|-----------|
| ZnP <sub>2</sub> |  | Phosphorus vapor passed over Zn in sealed quartz system | Ref. 141  |
| ZnSe             |  | Can be synthesized colloiddally                         | Ref. 49   |
| ZnTe             |  | Can be synthesized colloiddally                         | Ref. 142  |

### S8. Analysis of electrochemical stability

The computational Pourbaix diagrams (Fig. S7 and Fig. S8) of the seven tested compounds are evaluated using the pymatgen (Python Materials Genomics) package [143]. The energies of the aqueous ions are corrected to reproduce the experimental dissolution energies of the reference solids as derived by Persson and coworkers [144]. All of the Pourbaix diagrams are generated by setting the ion concentrations to  $10^{-6}$  M at 25 °C. The electrochemical (meta)stability of each target compound is evaluated by computing its free energy difference with respect to the most stable phase in each of the Pourbaix domains [145]. The energy differences for all the synthesized compounds are summarized in the bar chart in Fig. S10 by setting the pH to 1.5 and 7 that corresponds to the two test conditions. The potential is chosen to be the flat-band potential using the geometric mean of Mulliken electronegativity. In addition, preliminary XRD analyses were performed to validate the computationally predicted electrochemical stability (Fig. S9). We found a good correlation between the predicted and experimental data. Most of the compounds exhibit a low ‘driving force’ for decomposition ( $<0.5$  eV/atom) [144-145]. Expectedly, the synthesized compounds are found to be more stable under neutral electrochemical conditions [condition (ii)] compared to acidic testing conditions [condition (i)].

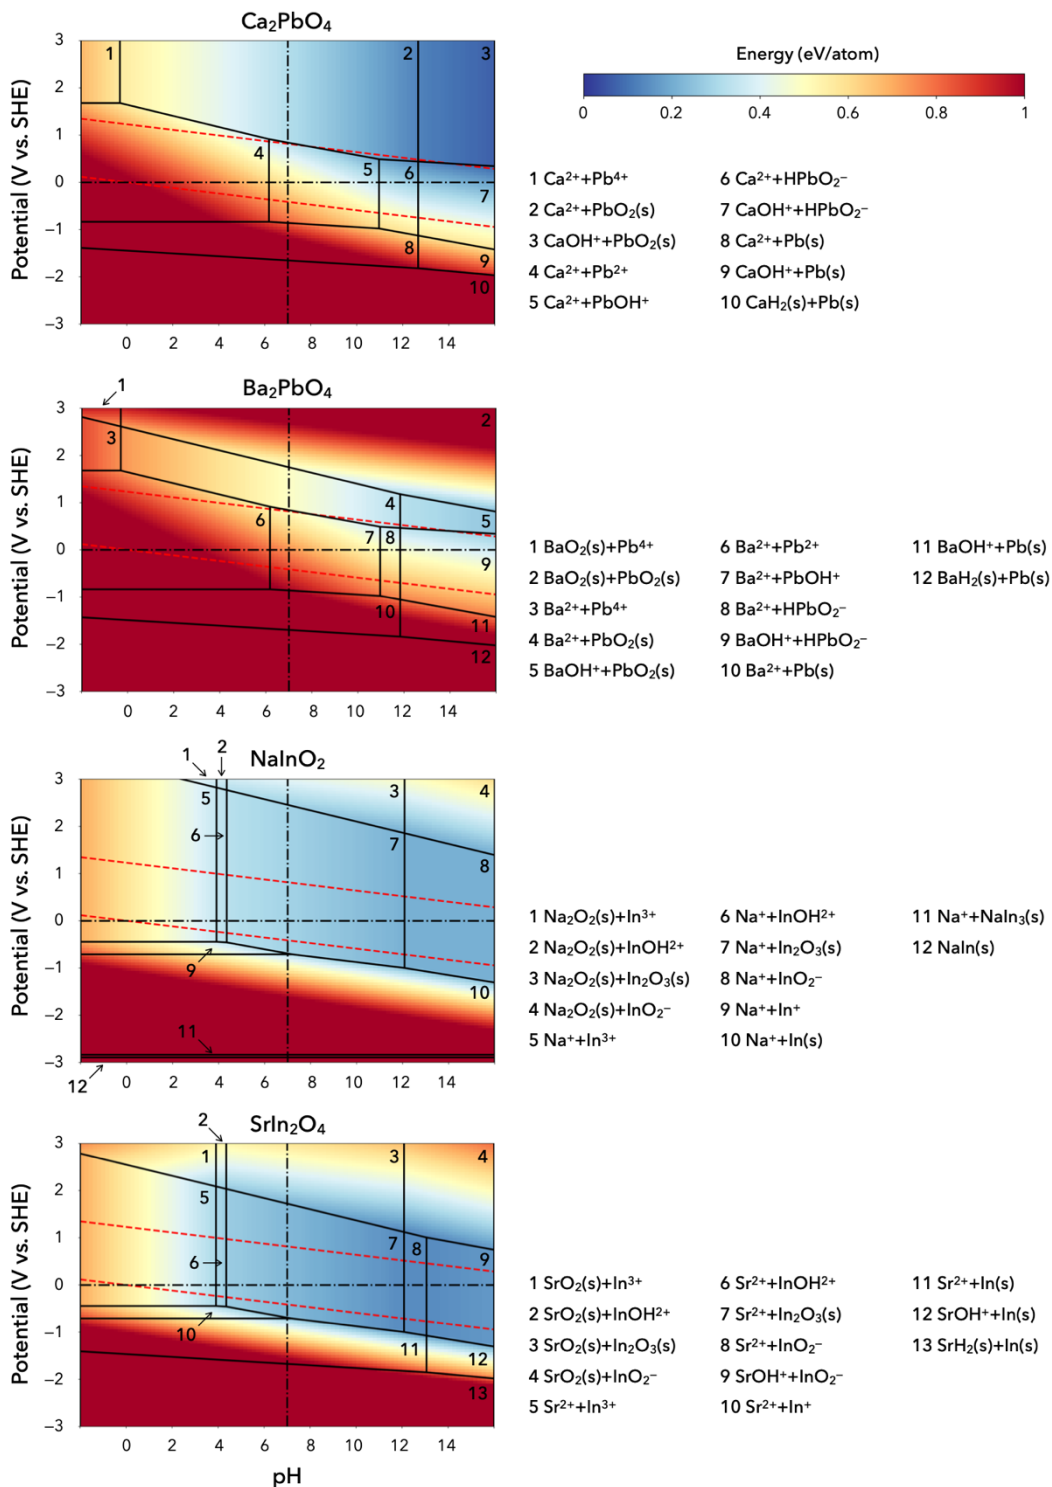

**Figure S7** Computed Pourbaix diagrams of Ca<sub>2</sub>PbO<sub>4</sub>, Ba<sub>2</sub>PbO<sub>4</sub>, NaInO<sub>2</sub>, and SrIn<sub>2</sub>O<sub>4</sub>. The heatmap visualizes the electrochemical stability of each compound with respect to the most stable Pourbaix phases. All of the stable Pourbaix domains are labeled.

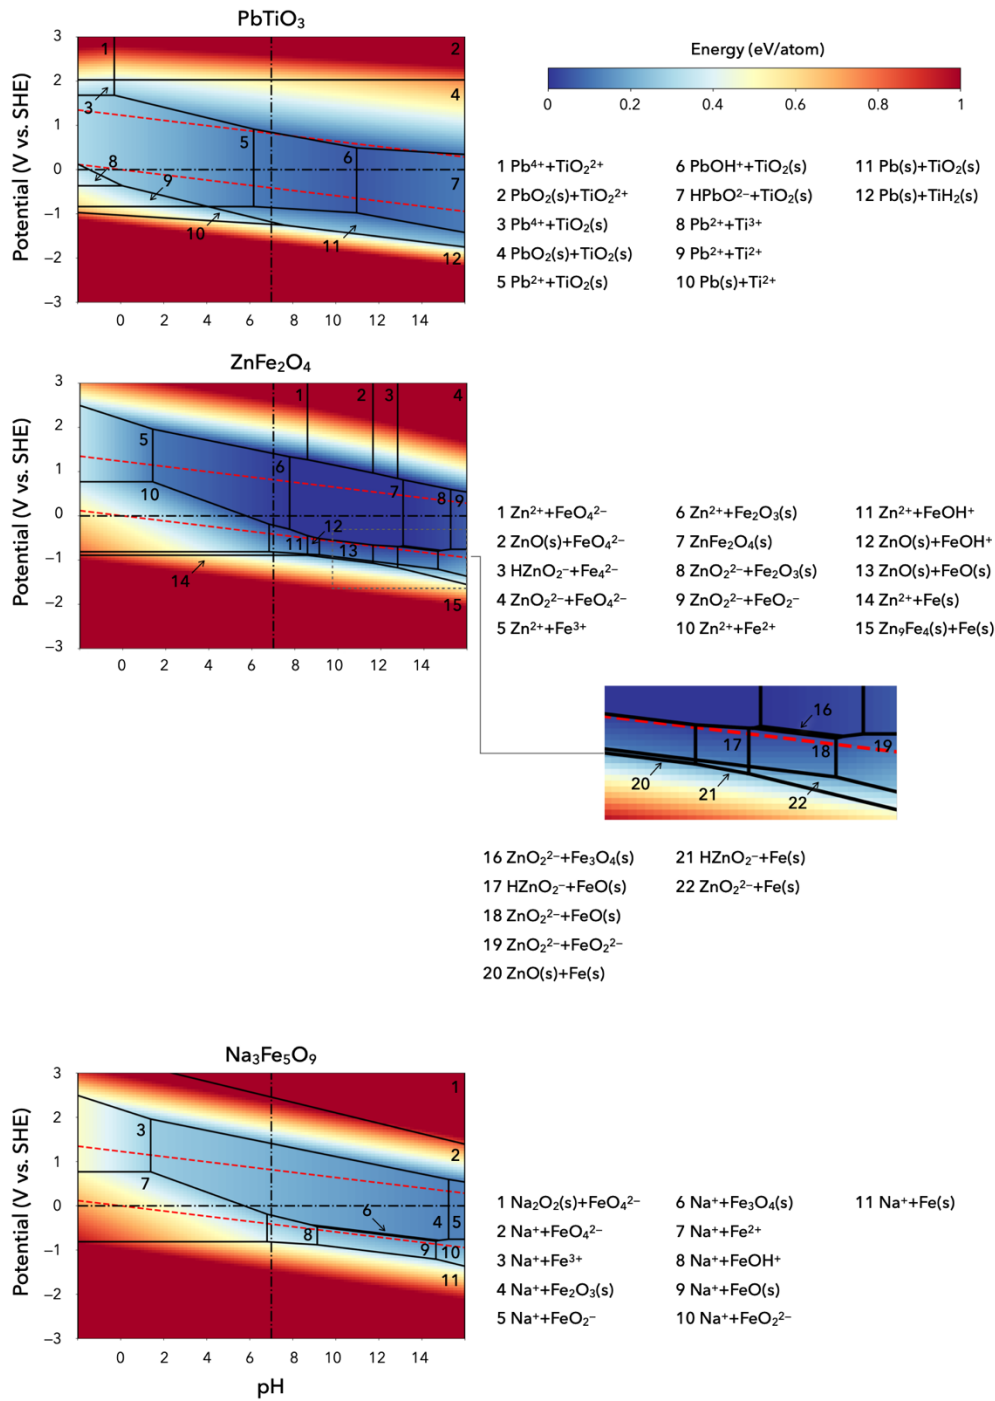

**Figure S8** Computed Pourbaix diagrams of PbTiO<sub>3</sub>, ZnFe<sub>2</sub>O<sub>4</sub>, and Na<sub>3</sub>Fe<sub>5</sub>O<sub>9</sub>. The heatmap visualizes the electrochemical stability of each compound with respect to the most stable Pourbaix phases. All of the stable Pourbaix domains are labeled.

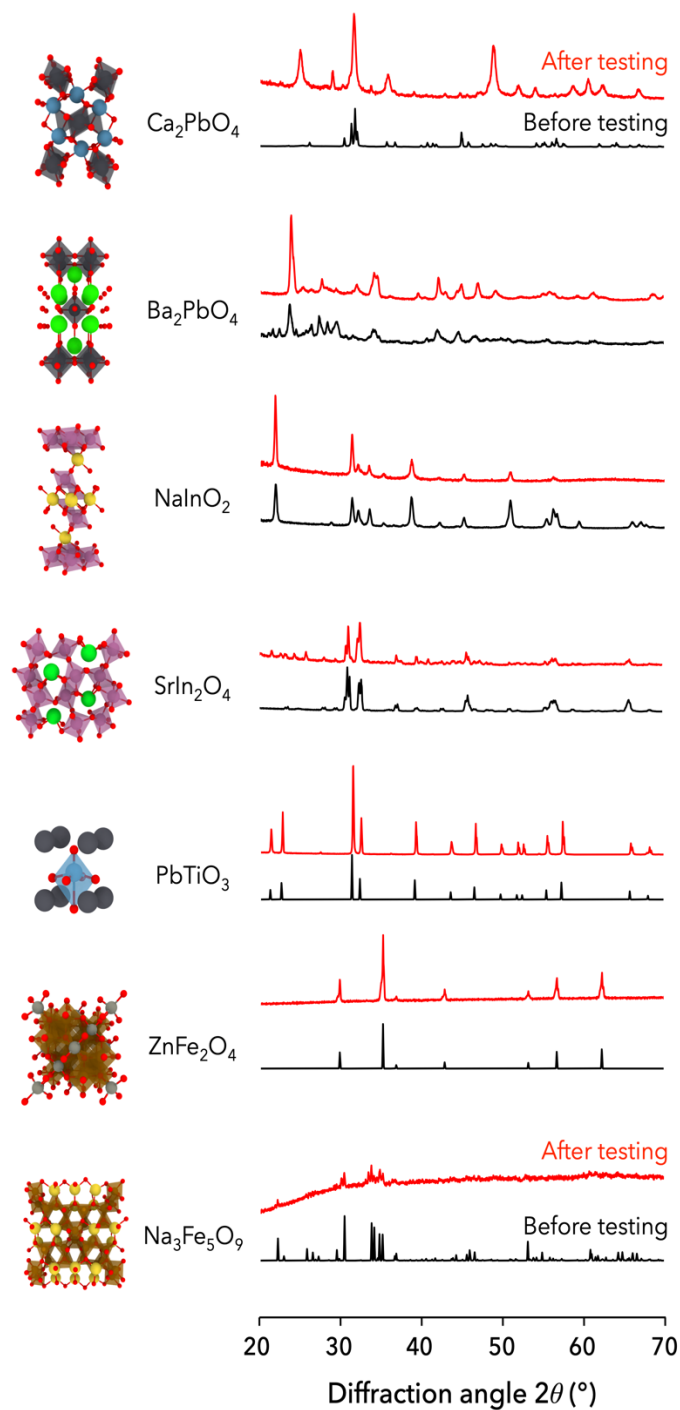

**Figure S9** X-ray diffraction of the synthesized compounds before and after testing under photocatalytic conditions. Except for  $\text{Na}_3\text{Fe}_5\text{O}_9$  (whose XRD pattern shows a significant background signal, while preserving the main peaks) and  $\text{Ba}_2\text{PbO}_4$  (which corrodes in humid atmosphere) most candidates show minor changes in the XRD patterns, indicating their potential stabilities in aqueous media.

Condition (i)

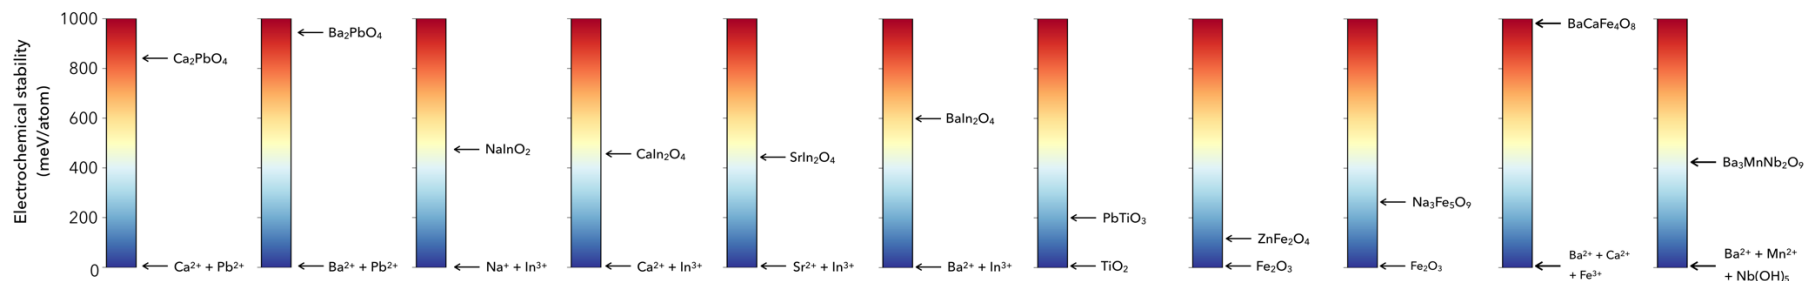

Condition (ii)

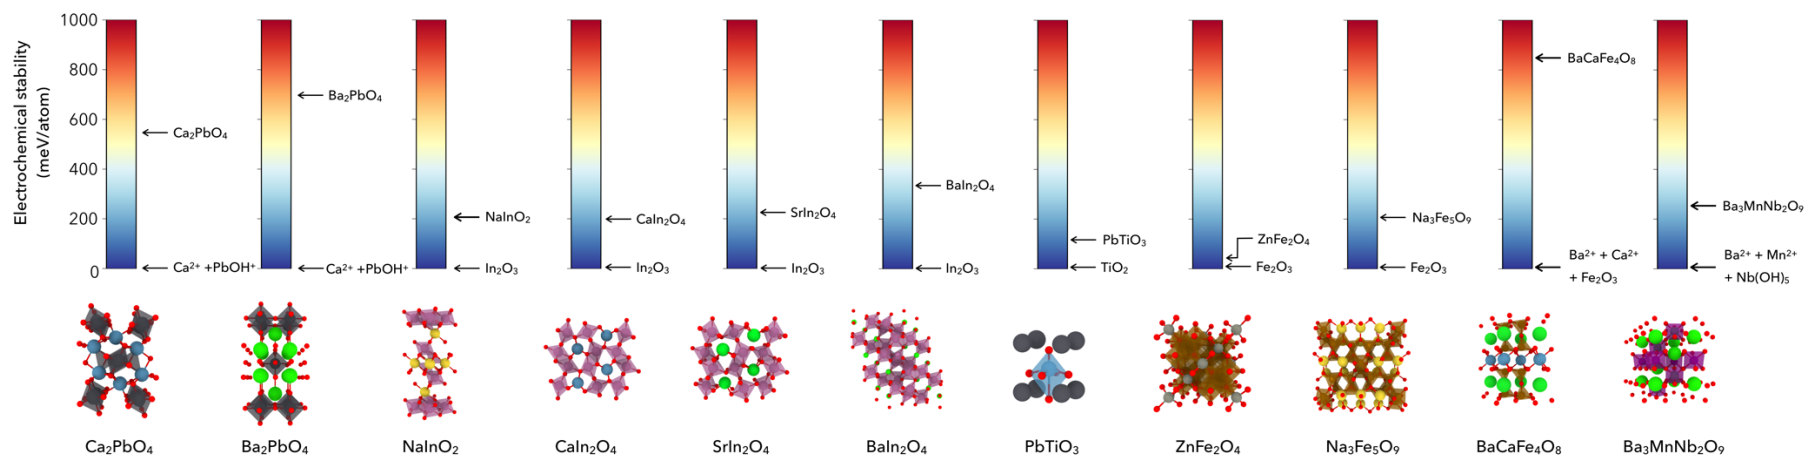

Figure S10 Predicted wlectrochemical stability energy of the synthesized compounds in aqueous solution under condition (i) (pH = 1.5) and condition (ii) (pH = 7).



## References

1. Kohler, *Zeitschrift für Kristallographie* **165**, 313-314 (2010).
2. Teske, Mueller-Buschbaum, *Organische Chemie* **27**, 296-301 (1972).
3. Zou, Hovmoller, Parras, Gonzalez-Calbet, Vallet-Regi, Grenier, *Acta Crystallographica A* **49**, 27-35 (1993).
4. Eisenmann, Hofmann, *Allgemeine Chemie* **580**, 151-159 (1990).
5. Weiss, Faivre, *Comptes Rendus Hebdomadaires des Séances de l'Académie des Sciences* **248**, 106-108 (1959).
6. Kabbour., Cario, Danot, Meerschaut, *Inorganic Chemistry* **45**, 917-922 (2006).
7. Liu, Withers, Whichello, Noren, Ting, Brink, Fitz Gerald, *Journal of Solid State Chemistry* **178**, 3389-3395 (2005).
8. Scheikowski, Müller-Buschbaum, *Zeitschrift für Anorganische und Allgemeine Chemie* **619**, 559-562 (1993).
9. Boulahya, Parras, González-Calbet, Martinez, *Chemistry of Materials* **14**, 4006-4008 (2002).
10. Litterer, Fettinger, Eichhorn, *Acta Crystallographica C* **53**, 163-165 (1997).
11. Dörrscheidt, Schaefer, *Zeitschrift für Naturforschung B* **36**, 410-414 (1981).
12. Esmailzadeh, Grins, Shen, Edén, Thiaux, *Chemistry of Materials* **16**, 2113-2120 (2004).
13. Herrmann, Bacmann, *Materials Research Bulletin* **6**, 725-735 (1971).
14. Gregory, Barker, Edwards, Slaski, Siddons, *Journal of Solid State Chemistry* **137**, 62-70 (1998).
15. Lalla, Müller-Buschbaum, *Journal of the Less Common Metals* **154**, 233-241 (1989).
16. Kawada, Yamaoka, Kato, *Acta Crystallographica B* **31**, 2905-2906 (1975).
17. Kabbour and Cario, *Inorganic Chemistry* **45**, 2713-2717 (2006).
18. Iglesias, Steinfink, *Acta Crystallographica B* **29**, 1480-1483 (1973).
19. Boysen, Lerch, Stys, Senyshyn, *Acta Crystallographica B* **63**, 675-682 (2007).
20. Miyazaki, Onoda, Oku, Kikuchi, Ishii, Ono, Morii, Kajitani, *Journal of the Physical Society of Japan* **71**, 491-497 (2002).
21. Parthe, Hu, *Journal of Solid State Chemistry* **174**, 165-166 (2003).
22. Teichert, Müller-Buschbaum, *Zeitschrift für Anorganische und Allgemeine Chemie* **607**, 128-130 (1992).
23. Hadenfeldt, Herdejürgen, Darstellung, *Journal of the Less Common Metals* **124**, 93-103 (1986).
24. Cruickshank, Taylor, Glasser, *Journal of Inorganic and Nuclear Chemistry* **26**, 937-941 (1964).
25. Nakai, Nagashima, Koto, Morimoto, *Acta Crystallographica B* **34**, 3569-3572 (1978).
26. Günther, Hagenmayer, Jansen, *Zeitschrift für Anorganische und Allgemeine Chemie* **626**, 1519-1525 (2000).
27. Baldinozzi, Calvarin, Sciau, Grebille, Suard, *Acta Crystallographica B* **56**, 570-576 (2000).
28. Rowsell, Nazar, *Journal of Materials Chemistry* **11**, 3228-3233 (2001).
29. Krivovichev, Armbruster, Depmeier, *Journal of Solid State Chemistry* **177**, 1321-1332 (2004).
30. Durichen, Bensch, *Acta Crystallographica C* **54**, 706-708 (1998).
31. Huang, Ibers, *Inorganic Chemistry* **40**, 2346-2351 (2001).
32. Hestermann, Hoppe, *Zeitschrift für Anorganische und Allgemeine Chemie* **367**, 249-260 (1969).
33. Stoumpos, Frazer, Clark, Kim, Rhim, Freeman, Ketterson, Jang, Kanatzidis. *Journal of the American Chemical Society* **137**, 6804-6819 (2015).
34. Kumada, Kinomura, Sleight, *Acta Crystallographica C* **52**, 1063-1065 (1996).
35. Seifert, Dau, *Zeitschrift fuer Anorganische und Allgemeine Chemie* **391**, 302-312 (1972).
36. Zandbergen, *Journal of Solid State Chemistry* **35**, 367-375 (1980).
37. Kanishcheva, Batog, Mikhailov, Kuznetsov, *Proceedings of the USSR Academy of Sciences* **251**, 603-605 (1980).
38. Crossland, Evans, *Chemical Communications* **18**, 2292-2293 (2003).
39. Pfitzner, *Zeitschrift für Kristallographie - Crystalline Materials* **213**, 228-236 (2010).
40. Koop, Müller-Buschbaum, *Zeitschrift für Anorganische und Allgemeine Chemie* **530**, 7-15 (1985).
41. Wyckoff, Posnjak, *Journal of the American Chemical Society* **44**, 30-36 (1922).
42. Olofsson, *Acta Chemica Scandinavica* **19**, 229-241 (1965).

43. White, Miller, Nielsen, *Acta Crystallographica* **19**, 1060-1061 (1965).
44. Bluhm, Müller-Buschbaum, *Zeitschrift für Anorganische und Allgemeine Chemie* **582**, 15-20 (1990).
45. Bredol, Leute, *Physica Status Solidi (A)* **107**, 7-10 (1988).
46. Burnus, Zajonc, Meyer, *Zeitschrift für Kristallographie* **210**, 62-62 (1995).
47. Nagatani, Suzuki, Kita, Tanaka, Katsuya, Sakata, Miyoshi, Yamaguchi, Omata, *Inorganic Chemistry* **54**, 1698-1704 (2015).
48. Juza, Hahn, *Zeitschrift für Anorganische und Allgemeine Chemie* **239**, 282-287 (1938).
49. Wyckoff, *Crystal Structures* (Second Edition), John Wiley, New York, PP. 85-237 (1963).
50. Kwak, J.-E. & Yun, H. (2005). *Acta Cryst.* C61, i81-i82.
51. Zachariasen, *Physical Review* **40**, 917-922 (1932).
52. Grzechnik, Mezouar, Stolen, Bakken, Grande, *Journal of Solid State Chemistry* **150**, 121-127 (2000).
53. Abrikosov, Danilova-Dobryakova, *Inorganic Materials* **1**, 187-190 (1965).
54. Marezio, *Acta Crystallographica* **20**, 723-728 (1966).
55. Chapuis, Gnehm, Kraemer, *Acta Crystallographica B* **28**, 3128-3130 (1972).
56. Wang, Hwu, *Chemistry of Materials* **19**, 6212-6221 (2007).
57. Vermin, Verschoor, Ijdo, *Acta Crystallographica B* **32**, 3325-3328 (1976).
58. Bensch, Duerichen, Weidlich, *Zeitschrift für Kristallographie* **211**, 931-931 (1996).
59. Lu, Wu, Ibers, *European Journal of Solid State and Inorganic Chemistry* **30**, 101-110 (1993).
60. Evenson IV and Dorhout, *Inorganic Chemistry* **40**, 2875-2883 (2001).
61. Von Schnering, Kliche, Somer, Ohse, Kempa, Wolf, Meyer, Hoenle, *Zeitschrift für Anorganische und Allgemeine Chemie* **601**, 13-30 (1991).
62. Dickerson, Fisher, Sykora, Albrecht-Schmitt, Cody, *Inorganic Chemistry* **41**, 640-642 (2002).
63. Chan, Feng, Hulvey, Dorhout, *Zeitschrift für Kristallographie* **220**, 11 (2005).
64. Benhamada, Grandin, Borel, Leclaire, Raveau, *Journal of Solid State Chemistry* **91**, 264-270 (1991).
65. Hönle, Schmettow, Peters, Chang, von Schnering, *Zeitschrift für Anorganische und Allgemeine Chemie* **630**, 1858-1862 (2004).
66. Breshears, Kanatzidis, *Journal of the American Chemical Society* **122**, 7839-7840 (2000).
67. Krasutskaya, Chizhova, Busel', Klyndyuk, *Chemistry and Technology of Inorganic Materials and Substances* **3**, 35-39 (2013).
68. Uhrlandt, Meyer, *Zeitschrift für Anorganische und Allgemeine Chemie* **620**, 1872-1878 (1994).
69. Hoppe, Baier, *Zeitschrift für Anorganische und Allgemeine Chemie* **511**, 161-175 (1984).
70. Weber, Schurz, Frunder, Kuhn, Schleid, *Crystals* **2**, 1136-1145 (2012).
71. Gall, Gougeon, *Acta Crystallographica C* **48**, 1915-1917 (1992).
72. Strobel, Choudhury, Dorhout, Lipp, Schleid, *Inorganic Chemistry* **47**, 4936-4944 (2008).
73. Jing, Meyer, *Zeitschrift für Anorganische und Allgemeine Chemie* **628**, 1548 (2002).
74. Strobel, Lauxmann, Schleid, *Anorganische Chemie Organische Chemie* **60**, 917-923 (2005).
75. Ueda, Hosono, *Thin Solid Films* **411**, 115-118 (2002).
76. Ostoréro, Leblanc, *Acta Crystallographica C* **46**, 1376-1378 (1990).
77. Clarke, Guinot, Michie, Rosseinsky, Calmont, *Chemistry of Materials* **14**, 288-294 (2002).
78. Lutz, Cockcroft, Kuske, Schneider, *Materials Research Bulletin* **25**, 451-456 (1990).
79. Kee, Yun, *Acta Crystallographica E* **69**, i11-i12 (2013).
80. Lin, Li, Gray, Mitchell, *Crystal Growth and Design* **12**, 1232-1238 (2012).
81. Fischer, Glaum, Carl, Hoppe, *Zeitschrift für Anorganische und Allgemeine Chemie* **585**, 75-81 (1990).
82. Cardoso, Chamberland, Hewston, Cox, *Journal of Solid State Chemistry* **72**, 234-243 (1988).
83. Antao, Hassan, Parise, *American Mineralogist* **90**, 219-228 (2005).
84. Mironov, Kazakov, Jun, Karpinski, *Acta Crystallographica C* **58**, i95-i97 (2002).
85. Wang, Tang, Zhu, Li, Zhu, Wang, Si, Qian, *Journal of Materials Chemistry* **22**, 14559 (2012).
86. Yanagisawa, Tashiro, Anzai, *Journal of Inorganic and Nuclear Chemistry* **31**, 943-946 (1969).
87. Rimet, Roques, Buder, Schlenker, Zanchetta, *Solid State Communications* **37**, 693-697 (1981).

88. Wang, Liu, Ambrosini, Maignan, Stern, Poeppelmeier, Dravid, *Solid State Sciences* **2**, 99-107 (1998).
89. Zhang, *Physics and Chemistry of Minerals* **26**, 644-648 (1999).
90. Boeschen, Keller, *Zeitschrift für Kristallographie* **200**, 305-315 (1992).
91. Dickinson, Pauling, *Journal of the American Chemical Society* **45**, 1466-1471 (1923).
92. Towle, Oberbeck, Stajdohar, Brown, *Science* **154**, 895-896 (1966).
93. Klepp, Hainz, *Zeitschrift für Anorganische und Allgemeine Chemie* **626**, 863-866 (2000).
94. Daniel, Maurin, Moret, Philippot, *Journal of Solid State Chemistry* **22**, 385-391 (1977).
95. Schwedes, Hoppe, *Zeitschrift für Anorganische und Allgemeine Chemie* **393**, 136-148 (1972).
96. Gomers, Rooymans, de Graaff, *Acta Crystallographica* **22**, 766-771 (1967).
97. Feger, Kolis, *Acta Crystallographica Section C* **54**, 1055-1057 (1998).
98. Jacobs, Niewa, *European Journal of Solid State and Inorganic Chemistry* **31**, 105-113 (1994).
99. Brachtel, Hoppe, *Zeitschrift für Anorganische und Allgemeine Chemie* **446**, 97-104 (1978).
100. Panin, Shpanchenko, Mironov, Velikodny, Antipov, Hadermann, Tarnopolsky, Yaroslavtsev, Kaul, Geibel, *Chemistry of Materials* **16**, 1048-1055 (2004).
101. Amann, Moeller, *Zeitschrift für Anorganische und Allgemeine Chemie* **628**, 1756-1760 (2002).
102. Amann, Moeller, *Zeitschrift für Anorganische und Allgemeine Chemie* **627**, 2571-2575 (2001).
103. Zentgraf, Hoppe, *Zeitschrift für Anorganische und Allgemeine Chemie* **462**, 61-70 (1980).
104. Lekse, Haycock, Lewis, Kauffman, Matraga, *Journal of Materials. Chemistry A* **2**, 9331-9337 (2014).
105. Abakumov, Tsirlin, Bakaimi, Van Tendeloo, Lappas, *Chemistry of Materials* **26**, 3306-3315 (2014).
106. Wang, Xu, Zheng, *Solid State Sciences* **5**, 573-578 (2003).
107. Roth, Meyer, Kaindl, Hu, *Zeitschrift für Anorganische und Allgemeine Chemie* **619**, 1369-1373 (1993).
108. Jensen, Kjekshus, *Journal of the Less Common Metals* **13**, 357-359 (1967).
109. Kars, Rebbah, Rebbah, *Acta Crystallographica Section E* **61**, i180-i181 (2005).
110. Krebs, *Anorganische Chemie Organische Chemie* **25**, 223-224 (1970).
111. Dickinson, Friauf, *Journal of the American Chemical Society*, **46**, 2457-2463 (1924).
112. Goodyear, Ali, Steigmann, *Acta Crystallographica B* **33**, 2932-2933 (1977).
113. Möller, Kerp, *Acta Crystallographica Section E* **61**, i146-i147 (2005).
114. Sishen, Geller, *Journal of Solid State Chemistry* **63**, 326-335 (1986).
115. Hönle, Peters, Schmettow, Chang, von Schnering, *Zeitschrift für Anorganische und Allgemeine Chemie* **630**, 1858-1862 (2004).
116. Stoll, Nather, Jeb, Bensch, *Solid State Sciences* **2**, 563-568 (2000).
117. Kyono, Kimata, Matsuhisa, Miyashita, Okamoto, *Physics and Chemistry of Minerals* **29**, 254-260 (2002).
118. Doussier, Moelo, Meerschaut, Leone, Evain, *Solid State Sciences* **9**, 792-803 (2007).
119. Li, Wang, Zhang, Jia, Yu, Zhu, Tao, *CrystEngComm* **19**, 6986-6991 (2017).
120. Chattopadhyay, von Schnering, *Studies in Inorganic Chemistry* **3**, 761-764 (1983).
121. Hofmann, *Zeitschrift für Kristallographie, Kristallgeometrie, Kristallphysik, Kristallchemie* **92**, 161-173 (1935).
122. Filsø, Eikeland, Zhang, Madsen, Iversen, *Dalton Transactions* **45**, 3798-3805 (2016).
123. Teske, Müller-Buschbaum, *Zeitschrift für Anorganische und Allgemeine Chemie* **379**, 113-121 (1970).
124. Onoda, Saeki, Yajima, *Journal of Solid State Chemistry* **105**, 354-362 (1993).
125. Kabbour, Janod, Corraze, Danot, Lee, Whangbo, Cario, *Journal of the American Chemical Society* **130**, 8261-8270 (2008).
126. Hector, Hutchings, Weller, Thomas, Needs, *Journal of Materials Chemistry* **11**, 527-532 (2001).
127. Tsujimoto, Matsushita, Hayashi, Yamaura, Uchikoshi, *Crystal Growth and Design* **14**, 4278-4284 (2014).
128. Troemel, *Naturwissenschaften* **52**, 492-493 (1965).
129. Floros, Hervieu, van Tendeloo, Michel, Maignan, Raveau, *Solid State Sciences* **2**, 1-9 (1998).
130. Choi, Kanatzidis, *Inorganic Chemistry* **39**, 5655-5662 (2000).

131. Motomitsu, Yanagi, Kamiya, Hirano, Hosono, *Journal of Solid State Chemistry* **179**, 1668-1673 (2006).
132. Sato, Saito, Nishiyama, Inoue, *Chemistry Letters* **9**, 868–869 (2001).
133. Sun *et al.*, *Angewandte Chemie* **128**, 2880-2884 (2016).
134. Cole, Espenschied, *Journal of Physical Chemistry* **41**, 445-451 (1937).
135. Shpanchenko, Chernaya, Abakumov, Hadermann, Antipov, Van Tendeloo, Kaul, Geibel, Sheptyakov, Balagurov, *Zeitschrift für Anorganische und Allgemeine Chemie* **627**, 2143-2150 (2001).
136. Schonberg, Nils, *Acta Chemica Scandinavica* **8**, 221-225 (1954).
137. Schutte, De Boer, Jellinek, *Journal of Solid State Chemistry* **70**, 207-209 (1987).
138. Lauxmann, Schleid, *Zeitschrift für Anorganische und Allgemeine Chemie* **626**, 1608-1612 (2000).
139. O'Neill, *European Journal of Mineralogy* **4**, 571-580 (1992).
140. Pfister, *Acta Crystallographica* **11**, 221-224 (1958).
141. Hegyi, Loebner, Poor, White, *Journal of Physics and Chemistry of Solids* **24**, 333-337 (1963).
142. Zachariasen, *Norsk Geologisk Tidsskrift* **8**, 302-306 (1926).
143. Ong, Richards, Jain, Hautier, Kocher, Cholia, Gunter, Chevrier, Persson, Ceder, *Comput. Mater. Sci.* **68**, 314-319 (2013)
144. Singh, Zhou, Shinde, Suram, Montoya, Winston, Gregoire, Persson. *Chem. Mater.* **29**, 23, 10159-10167 (2017)
145. Singh, Montoya, Gregoire, Persson. *Nat. Commun.* **10**. 443 (2019)
